# Characterization of emetic and diarrheal *Bacillus cereus* strains from a 2016 foodborne outbreak using whole-genome sequencing: addressing the microbiological, epidemiological, and bioinformatic challenges

1 **Laura M. Carroll<sup>1</sup>, Martin Wiedmann<sup>1</sup>, Manjari Mukherjee<sup>2</sup>, David C.**  
2 **Nicholas<sup>3</sup>, Lisa A. Mingle<sup>4</sup>, Nellie B. Dumas<sup>4</sup>, Jocelyn A. Cole<sup>4</sup>, Jasna Kovac<sup>2\*</sup>**

3 <sup>1</sup>Department of Food Science, Cornell University, Ithaca, NY, USA

4 <sup>2</sup>Department of Food Science, The Pennsylvania State University, State College, PA,  
5 USA

6 <sup>3</sup>New York State Department of Health, Corning Tower, Empire State Plaza, Albany,  
7 NY, USA

8 <sup>4</sup>Wadsworth Center, New York State Department of Health, Albany, NY, USA

9 **\* Correspondence:**

10 Jasna Kovac  
11 [jzk303@psu.edu](mailto:jzk303@psu.edu)

12 **Keywords: *Bacillus cereus*, foodborne outbreak, whole-genome sequencing,**  
13 **emetic disease, cytotoxicity, SNP calling, genomic epidemiology**

14

## ***Bacillus cereus* outbreak genomic sequencing**

### 15 **Abstract**

16 The *Bacillus cereus* group comprises multiple species capable of causing emetic or  
17 diarrheal foodborne illness. Despite being responsible for tens of thousands of  
18 illnesses each year in the U.S. alone, whole-genome sequencing (WGS) has not been  
19 routinely employed to characterize *B. cereus* group isolates from foodborne  
20 outbreaks. Here, we describe the first WGS-based characterization of isolates linked  
21 to an outbreak caused by members of the *B. cereus* group. In conjunction with a 2016  
22 outbreak traced to a supplier of refried beans served by a fast food restaurant chain in  
23 upstate New York, a total of 33 *B. cereus* group strains were obtained from human  
24 cases (n = 7) and food samples (n = 26). Emetic (n = 30) and diarrheal (n = 3) isolates  
25 were most closely related to *B. paranthracis* (clade III) and *B. cereus sensu stricto*  
26 (clade IV), respectively. WGS indicated that the 30 emetic isolates (24 and 6 from  
27 food and humans, respectively) were closely-related and formed a well-supported  
28 clade relative to publicly-available emetic clade III genomes with an identical  
29 sequence type (ST 26). When compared to publicly-available emetic clade III ST 26  
30 *B. cereus* group genomes, the 30 emetic clade III isolates from this outbreak differed  
31 from each other by a mean of 8.3 to 11.9 core single nucleotide polymorphisms  
32 (SNPs), while differing from publicly-available genomes by a mean of 301.7 to 528.0  
33 core SNPs, depending on the SNP calling methodology used. Using a WST-1 cell  
34 proliferation assay, the strains isolated from this outbreak had only mild detrimental  
35 effects on HeLa cell metabolic activity compared to reference diarrheal strain *B.*  
36 *cereus* ATCC 14579. Based on both WGS and epidemiological data, we hypothesize  
37 that the outbreak was a single source outbreak caused by emetic clade III *B. cereus*  
38 belonging to the *B. paranthracis* species. In addition to showcasing how WGS can be  
39 used to characterize *B. cereus* group strains linked to a foodborne outbreak, we also  
40 discuss potential microbiological and epidemiological challenges presented by *B.*  
41 *cereus* group outbreaks, and we offer recommendations for analyzing WGS data from  
42 the isolates associated with them.

43

## ***Bacillus cereus* outbreak genomic sequencing**

### 44 **1 Introduction**

45 The *Bacillus cereus* (*B. cereus*) group, also known as *B. cereus sensu lato*  
46 (*s.l.*) is a complex of closely-related species that vary in their ability to cause disease  
47 in humans. Foodborne illness caused by members of the group primarily manifests  
48 itself in one of two forms: (i) emetic disease that is caused by cereulide, a heat-stable  
49 toxin produced by *B. cereus* within a food matrix prior to ingestion, or (ii) a diarrheal  
50 form of the disease, caused by enterotoxins produced in the small intestine of the host  
51 (Ehling-Schulz et al., 2004; Schoeni and Wong, 2005; Stenfors Arnesen et al., 2008).  
52 Here we refer to isolates that carry *ces* genes encoding the cereulide biosynthetic  
53 pathway as emetic isolates, and isolates that lack *ces* genes but carry either *hbl* or  
54 *cytK* genes that encode diarrheal enterotoxins as diarrheal isolates.

55 As foodborne pathogens, members of the *B. cereus* group are estimated to  
56 cause 63,400 foodborne disease cases per year in the U.S. (Scallan et al., 2011) and  
57 are confirmed or suspected to have been responsible for 235 outbreaks reported in the  
58 U.S. between 1998 and 2008 (Bennett et al., 2013). Due in part to its typically mild  
59 and self-limiting nature, foodborne illness caused by members of the *B. cereus* group  
60 is under-reported (Granum and Lund, 1997; Stenfors Arnesen et al., 2008), although  
61 severe infections resulting in patient death have been reported (Naranjo et al., 2011;  
62 Sanaei-Zadeh, 2012; Lotte et al., 2017). Furthermore, *B. cereus* group isolates that  
63 have been linked to human clinical cases of foodborne disease rarely undergo whole-  
64 genome sequencing (WGS), as is becoming the norm for other foodborne pathogens  
65 (Joensen et al., 2014; Ashton et al., 2015; Moura et al., 2017).

66 Here, we describe a foodborne outbreak caused by members of the *B. cereus*  
67 group in which WGS was implemented to characterize isolates from human clinical  
68 cases and food. To our knowledge, this is the first description of a *B. cereus* outbreak  
69 in which WGS was employed to characterize isolates. By testing various  
70 combinations of variant calling methodologies, we showcase how different  
71 bioinformatics pipelines can yield vastly different results when pairwise SNP  
72 differences are the desired metric for determining whether an isolate is part of an  
73 outbreak or not. In addition to discussing the bioinformatic challenges, we examine  
74 potential microbiological and epidemiological obstacles that can hinder  
75 characterization of *B. cereus* group isolates from suspected foodborne outbreaks, and  
76 we offer recommendations to guide the characterization of future *B. cereus* group  
77 outbreaks using WGS.

### 78 **2 Materials and Methods**

#### 79 **2.1 Collection of epidemiological data**

80 Epidemiological investigations were coordinated by the New York State  
81 Department of Health (NYSDOH), and the outbreak was reported to the U.S. Centers  
82 for Disease Control and Prevention (CDC). Investigation methods included (i) a  
83 cohort study, (ii) food preparation review, (iii) an investigation at a  
84 factory/production/treatment plant, (iv) food product traceback, and (v)  
85 environment/food/water sample testing.

#### 86 **2.2 Isolation and initial characterization of *B. cereus* strains**

## **Bacillus cereus outbreak genomic sequencing**

87 Stool specimens were plated directly onto mannitol-egg yolk-polymyxin (MYP)  
88 agar and incubated aerobically at 37°C for 24 h. Food samples were diluted 1:10 in 1  
89 X PBS, pH 7.4 in a filter bag for homogenizer blenders and homogenized for 2 min.  
90 One hundred µl of each homogenized sample were plated onto MYP agar and  
91 incubated aerobically at 37°C for 24 h. The MYP agar plates for both the stool  
92 specimens and food samples were observed after the 24-hour incubation period.  
93 Individual *B. cereus*-like colonies (i.e., pink colored and lecithinase positive) were  
94 subcultured to trypticase soy agar (TSA) plates supplemented with 5% sheep blood  
95 and incubated aerobically at 37°C for 18-24 h. These isolates were identified as *B.*  
96 *cereus* using the following conventional microbiological techniques: Gram stain,  
97 colony morphology, hemolysis, motility, and spore stain. To differentiate between *B.*  
98 *cereus* and *B. thuringiensis*, isolates were cultured for 48 h at 37°C on sporulation  
99 agar slants. Smears were prepared, and slides were heat fixed and then stained using  
100 malachite green and counter stained with carbol fuchsin (Tallent et al., 2012). Slides  
101 were then observed for the presence or absence of parasporal crystals.

### **102 2.3 *rpoB* allelic typing**

103 The 33 outbreak isolates were streaked onto brain heart infusion (BHI) agar  
104 from their respective cryo stocks stored at -80 °C and incubated overnight at 37 °C.  
105 Single isolated colonies were inoculated in 5 ml BHI broth and incubated overnight at  
106 32 °C and used for genomic DNA extraction using Qiagen DNeasy blood and tissue  
107 kits (Qiagen). Extracted DNA was used as a template in a PCR reaction using primers  
108 targeting a 750 bp sequence of the *rpoB* gene (RzrpoBF:  
109 AARYTIGGMCCTGAAGAAAT and RZrpoBR:  
110 TGIARTTRTCATCAACCATGTG) (Ivy et al., 2012). PCR was carried out in 25 µl  
111 reactions using GoTaq Green Master Mix (Promega Corporation) under the following  
112 thermal cycling conditions: 3 min at 94°C, followed by 40 cycles of 30 s at 94°C, 30 s  
113 at 55-45°C (in the first 20 cycles the temperature was reduced for 0.5°C per cycle and  
114 then kept at 45°C in the following 20 cycles), followed by 1 min at 72°C, and a final  
115 hold at 4°C. The resulting PCR product was used for genotyping and preliminary  
116 species identification (Ivy et al., 2012).

### **117 2.4 Bacterial growth conditions and collection of bacterial supernatants**

118 The 33 outbreak isolates, as well as *B. cereus s.s.* type strain ATCC 14579 and  
119 *B. cereus* emetic reference strain DSM 4312 (Food Microbe Tracker ID FSL M8-  
120 0547; Vangay et al., 2013) were streaked onto BHI agar from their respective cryo  
121 stocks stored at -80 °C. Single isolated colonies were inoculated in 5 ml BHI broth  
122 and incubated at 37 °C without shaking. For immunoassays and cytotoxicity assays  
123 (see sections 2.5 and 2.6), overnight cultures (grown for 18 h at 37 °C) were used for  
124 inoculation of fresh BHI broth, and the cultures were grown to early stationary phase  
125 (OD<sub>600</sub> of approximately 1.5, which equals approximately 10<sup>8</sup> CFU/ml). The growth  
126 was quenched by placing them on ice. The cultures were spun down at 16,000 g for 2  
127 min, and the supernatants were collected, aliquoted in duplicate, and stored at -80°C  
128 until further use.

### **129 2.5 Hemolysin BL and nonhemolytic enterotoxin detection**

130 Diarrheal strains grown as described above were used for qualitative detection  
131 of hemolysin BL (Hbl) and nonhemolytic enterotoxins (Nhe) with the Duopath

## **Bacillus cereus outbreak genomic sequencing**

132 Cereus Enterotoxins immunoassay (Merck). Only select representatives of emetic  
133 outbreak strains were tested (i.e., FSL R9-6381, FSL R9-6382, FSL R9-6384, FSL  
134 R9-6389, FSL R9-6395, and FSL R9-6399), as they did not carry genes encoding Hbl  
135 and were therefore not expected to produce Hbl. Briefly, the temperature of cultures  
136 and immunoassays was adjusted to room temperature. 150 µl of each isolate culture  
137 were added to the immunoassay port, following the manufacturer's instructions. The  
138 results were read as positive if a red line was visible after a 30-min incubation at room  
139 temperature. Tests were considered valid only when controls lines were visible.

### **140 2.6 WST-1 metabolic activity assay**

141 HeLa cells were seeded in 96-well plates at a seeding density of  $8 \times 10^4$   
142 cells/cm<sup>2</sup> (Fisichella et al., 2009) in Eagle's minimum essential medium (EMEM)  
143 supplemented with 10% fetal bovine serum (FBS) and allowed to grow for 18-24 h at  
144 37°C, 5% CO<sub>2</sub>. The medium in each well was replaced with 100 µl of fresh medium  
145 containing 5% v/v of bacterial supernatants (prepared as described above) that were  
146 thawed, pre-warmed to 37°C, and mixed. The medium containing supernatants was  
147 added to the cells using a multichannel pipettor to minimize the variability in the  
148 duration of cell exposure to the toxin amongst wells of a 96-well plate. Medium  
149 containing 5% BHI was used as a negative control and medium containing 5% of 1%  
150 Triton X-100 prepared in BHI (final concentration in the well of 0.05%) was used as a  
151 positive control, with the latter expected to reduce the viability of HeLa cells. After  
152 15 min of intoxication at 37 °C, 5% CO<sub>2</sub> (Miller et al., 2018), 10 µl of WST-1 dye  
153 solution (Roche) was added to each well of the plate, and the plate was incubated for  
154 25 min at 37 °C, 5% CO<sub>2</sub>, resulting in a total of 40 min exposure of cells to the  
155 supernatants. After 30 s of orbital shaking at 600 rpm, the absorbances were read by a  
156 microplate reader (Thermo Scientific Multiskan GO, Thermo Fisher Scientific) in  
157 precision mode at 450 nm and 690 nm, the latter being subtracted from the former to  
158 account for the background signal (i.e., corrected absorbances) (Fisichella et al.,  
159 2009). Each test, including 0.05% Triton X-100, was conducted with six technical  
160 replicates and on two different HeLa passages using supernatants from single  
161 biological replicates, resulting in a total of 12 technical replicates per isolate. The  
162 viability of cells was determined by calculating a ratio of corrected absorbances to  
163 that of BHI, converting to percentages, and calculating the mean of technical  
164 replicates for each isolate. The results were compared to the results for cells treated  
165 with (i) 0.05% Triton X-100, (ii) *B. cereus s.s.* type strain ATCC 14579 supernatant  
166 (i.e., reference for diarrheal strains), and (iii) *B. cereus* group strain DSM 4312  
167 supernatant (i.e., reference for emetic strains).

### **168 2.7 Statistical analysis of cytotoxicity data**

169 A Welch's test and the Games-Howell post-hoc test (appropriate for data with  
170 non-homogeneous variances) were performed using results of all 12 technical  
171 replicates of each outbreak-associated isolate, as well as on *B. cereus s.s.* type strain  
172 ATCC 14579, emetic reference stain *B. cereus* DSM 4312, and 0.05% Triton X-100.  
173 For the Games-Howell test, a Bonferroni correction was applied to correct for  
174 multiple comparisons. Statistical analyses were carried out in R version 3.4.3 (R Core  
175 Team, 2018).

### **176 2.8 Whole-genome sequencing**

## **Bacillus cereus outbreak genomic sequencing**

177 Genomic DNA was extracted from overnight cultures (~18 h) grown in BHI at  
178 32°C using Qiagen DNeasy blood and tissue kits (Qiagen) or the Omega E.Z.N.A.  
179 Bacterial DNA kit (Omega) following the manufacturers' instructions. For the  
180 E.Z.N.A. Bacterial DNA kit, the additional steps recommended for difficult to lyse  
181 bacteria were taken to obtain sufficient DNA yield. Briefly, one ml of an overnight  
182 culture was additionally treated with glass beads provided in the E.Z.N.A. kit. DNA  
183 was quantified using Qubit 3 and used for Nextera XT library preparation (Illumina).  
184 Pooled libraries were sequenced in two Illumina sequencing runs with 2 x 250 bp  
185 reads at the Penn State Genomics Core Facility and at the Cornell Animal Health  
186 Diagnostic Center.

### **187 2.9 Initial data processing and genome assembly**

188 Illumina adapters and low-quality bases were trimmed using Trimmomatic  
189 version 0.36 (Bolger et al., 2014) for Nextera paired-end reads, and FastQC version  
190 0.11.5 (<https://www.bioinformatics.babraham.ac.uk/projects/fastqc/>) was used to  
191 confirm that read quality was adequate. Genomes listed in Supplementary Table S1  
192 were assembled *de novo* using SPAdes version 3.11.0 (Bankevich et al., 2012), and  
193 average per-base coverage was calculated using BWA MEM version 0.7.13 (Li and  
194 Durbin, 2010) and Samtools version 1.6 (Li et al., 2009).

### **195 2.10 In silico typing and virulence gene detection**

196 BTyper version 2.2.0 (Carroll et al., 2017) was used to perform *in silico*  
197 virulence gene detection, multi-locus sequence typing (MLST), *panC* clade  
198 assignment, and *rpoB* allelic typing, as well as to extract the gene sequences for all  
199 detected loci. For virulence gene detection, the default settings were used (i.e., 50%  
200 amino acid sequence identity, 70% query coverage), as these cut-offs have been  
201 shown to correlate with PCR-based detection of virulence genes in *B. cereus* group  
202 isolates (Kovac et al., 2016; Carroll et al., 2017). BMiner version 2.0.2 (Carroll et al.,  
203 2017) was used to aggregate the output files from BTyper and create a virulence gene  
204 presence/absence matrix.

### **205 2.11 Construction of *k*-mer based phylogeny using outbreak strains and 206 genomes of 18 *B. cereus* group species**

207 kSNP version 3.1 (Gardner and Hall, 2013; Gardner et al., 2015) was used to  
208 produce a set of core SNPs among the 33 outbreak genomes, plus genomes from each  
209 of the 18 *B. cereus* group species listed in Supplementary Table S2, using the optimal  
210 *k*-mer size as determined by Kchooser ( $k = 21$ ). The resulting core SNPs were used in  
211 conjunction with RAxML version 8.2.11 (Stamatakis, 2014) to construct a maximum  
212 likelihood (ML) phylogeny using the GTRCAT model with a Lewis ascertainment  
213 bias correction (Lewis, 2001) and 500 bootstrap replicates. The resulting phylogenetic  
214 tree was formatted using the phylobase (R Hackathon et al., 2017), ggtree  
215 (Guangchuang et al., 2017), phytools (Revell, 2012), and ape (Paradis et al., 2004)  
216 packages in R version 3.4.3.

### **217 2.12 Variant calling and phylogeny construction using outbreak isolates**

218 Combinations of five reference-based variant calling pipelines (Table 1) and  
219 reference genomes (Table 2), as well as one reference-free SNP calling pipeline

## ***Bacillus cereus* outbreak genomic sequencing**

220 (Table 1), were used to separately identify core SNPs among (i) all 33 outbreak-  
221 related isolates (30 emetic clade III isolates and 3 clade IV isolates) and (ii) the subset  
222 of 30 emetic clade III isolates.

223 For the Samtools and Freebayes pipelines (Table 1), trimmed Illumina paired-  
224 end reads from the queried isolates were mapped to the appropriate reference genome  
225 using BWA mem version 0.7.13 (Li, 2013) and either Samtools/Bcftools version 1.6  
226 (Li et al., 2009) or Freebayes version 1.1.0 (Garrison and Marth, 2012), respectively,  
227 were used to call variants. vcftools version 0.1.14 (Danecek et al., 2011) was used to  
228 remove indels and SNPs with a mapping quality score < 20, as well as to construct  
229 consensus sequences. For both variant calling pipelines, Gubbins version 2.2.0  
230 (Croucher et al., 2015) was used to filter out recombination events from the consensus  
231 sequences. Both of these pipelines are publicly-available and can be reproduced in  
232 their entirety (SNPBac version 1.0.0; <https://github.com/lmc297/SNPBac>).

233 For the CFSAN (Davis et al., 2015) and LYVE-SET (Katz et al., 2017)  
234 pipelines (versions 1.0.1 and 1.1.4g, respectively; Table 1), trimmed Illumina paired-  
235 end reads were used as input, and all default pipeline steps were run as outlined in the  
236 manuals. For the Parsnp pipeline (Treangen et al., 2014) (Table 1), assembled  
237 genomes of the outbreak isolates were used as input, and Parsnp's implementation of  
238 PhiPack (Bruen et al., 2006) was used to filter out recombination events. For kSNP3  
239 (Table 1), assembled genomes of the outbreak isolates were used as input, and  
240 Kchooser was used to determine the optimum  $k$ -mer size for the full 33-isolate data  
241 set and the 30 emetic clade III isolate set ( $k = 21$  and  $23$ , respectively).

242 For all variant calling and filtering pipelines, RAxML version 8.2.10 was used  
243 to construct ML phylogenies using the resulting core SNPs under the GTRGAMMA  
244 model with a Lewis ascertainment bias correction and 1,000 bootstrap replicates.  
245 Phylogenetic trees were annotated using FigTree version 1.4.3  
246 (<http://tree.bio.ed.ac.uk/software/figtree/>).

### **2.13 Variant calling and statistical comparison of emetic outbreak isolates to publicly-available genomes**

249 To compare emetic clade III isolates from this outbreak to other emetic clade III  
250 isolates, BTyper version 2.2.1 was used to query all 2,156 *B. cereus* group genome  
251 assemblies available in NCBI's RefSeq database (Pruitt et al., 2007) and identify all  
252 genome assemblies that (i) belonged to clade III based on *panC* sequence, (ii)  
253 belonged to ST 26 using *in silico* MLST, and (iii) were found to possess the *ces*  
254 operon in its entirety (*cesABCD*) at the default coverage and identity thresholds. This  
255 search produced 25 genome assemblies in addition to the 30 emetic clade III genomes  
256 sequenced here. Only three of the 25 RefSeq genome assemblies had Sequence Read  
257 Archive (SRA) data linked to their BioSample accession numbers, making short read  
258 data readily available only for these three isolates. Consequently, only Parsnp version  
259 1.2 and kSNP version 3.1 were used to identify SNPs in all 55 clade III emetic  
260 genomes (25 from NCBI RefSeq and 30 sequenced here), as these approaches can be  
261 used with assembled genomes and do not require short reads as input. For Parsnp, the  
262 chromosome of *B. cereus* str. AH187 was used as a reference genome. For kSNP3,  
263 Kchooser was used to select the optimal  $k$ -mer size ( $k = 21$ ), and the chromosome of  
264 *B. cereus* str. AH187 was included for  $k$ -mer based SNP calling.

## ***Bacillus cereus* outbreak genomic sequencing**

265 RAxML version 8.2.10 was used to construct ML phylogenies using the  
266 resulting core SNPs for each of the Parsnp and kSNP3 pipelines under the GTRCAT  
267 model with a Lewis ascertainment bias correction and 1,000 bootstrap replicates.  
268 Pairwise core SNP differences between all 55 isolates were obtained using the  
269 `dist.gene` function in R's `ape` package. The `permutest` and `betadisper` functions in R's  
270 `vegan` package (Oksanen et al., 2018) were used to conduct an ANOVA-like  
271 permutation test to test if publicly-available genomes were more variable than isolates  
272 from this outbreak based on pairwise core SNP differences and 5 independent trials  
273 using 100,000 permutations each. Analysis of similarity (ANOSIM; Clarke, 1993)  
274 using the `anosim` function in the `vegan` package in R was used to determine if the  
275 average of the ranks of within-group distances was greater than or equal to the  
276 average of the ranks of between-group distances (Anderson and Walsh, 2013), where  
277 groups were defined as (i) the 30 emetic isolates from this outbreak, and (ii) the 25  
278 external emetic ST 26 isolates (downloaded from RefSeq). ANOSIM tests were  
279 conducted using pairwise core SNP differences and 5 independent runs of 10,000  
280 permutations each. For both the ANOVA-like permutation tests and the ANOSIM  
281 tests, Bonferroni corrections were used to correct for multiple comparisons at the  $\alpha =$   
282 0.05 level.

### **283 2.14 Statistical comparison of phylogenetic trees**

284 The Kendall-Colijn (Kendall and Colijn, 2015) test described by Katz, et al.  
285 (Katz et al., 2017) was used to compare the topologies of trees, using the `treospace`  
286 (Jombart et al., 2017), `ips` (Heibl, 2008), `phangorn` (Schliep, 2011), `docopt` (de Jonge,  
287 2016), and `stringr` (Wickham, 2018) packages in R version 3.4.3. The phylogenies  
288 that underwent pairwise testing were constructed using core SNPs identified in (i) 30  
289 emetic clade III genomes via all six SNP calling pipelines, and (ii) 55 emetic ST 26  
290 genomes (25 publicly-available genomes and the 30 emetic isolates sequenced here)  
291 using the kSNP3 and Parsnp pipelines. For all pairwise tree comparisons, a lambda  
292 value of 0 was used along with 100,000 random trees as a background distribution,  
293 and a Bonferroni correction was used to correct for multiple comparisons. Two trees  
294 were considered to be more topologically similar than would be expected by chance if  
295 a significant  $P$  value ( $P < 0.05$ ) resulted after correcting for multiple testing (Katz et  
296 al., 2017).

### **297 2.15 Calculation of average nucleotide identity values**

298 FastANI version 1.0 (Jain, 2017) was used to calculate average nucleotide identity  
299 (ANI) values between assembled genomes of isolates sequenced in this study and  
300 selected reference genomes (Table 2), as well as the genomes of 18 currently-  
301 recognized *B. cereus* group species (Table 3).

### **302 2.16 Availability of Data**

303 Trimmed Illumina reads for all 33 isolates sequenced in this study have been made  
304 publicly available (NCBI BioProject Accession PRJNA437714), with NCBI  
305 Biosample accession numbers for all isolates listed in Supplementary Table S1. All  
306 figures have been deposited in FigShare (DOI  
307 <https://doi.org/10.6084/m9.figshare.7001525.v1>), and records of all isolates are  
308 available in Food Microbe Tracker (Vangay et al., 2013).



## ***Bacillus cereus* outbreak genomic sequencing**

### 309 **3 Results**

#### 310 **3.1 Both emetic and diarrheal symptoms were reported among cases associated** 311 **with the *B. cereus* foodborne outbreak**

312 Between September 30<sup>th</sup> and October 6<sup>th</sup>, 2016, local health departments in  
313 upstate New York's Niagara and Erie counties reported a total of 179 estimated  
314 foodborne illness cases among customers of a Mexican fast-food restaurant chain in  
315 eight towns/cities. Among these cases, laboratory results were available for ten cases.  
316 For seven of these cases, *B. cereus* group species were isolated from patient stool  
317 samples. While no deaths, hospitalizations, or emergency room visits were reported  
318 from 169 cases from which information was obtained, 4 resulted in a visit to a health  
319 care provider (not including emergency room visits). More than 2/3 of 179 cases were  
320 female (69%), and 61% of cases fell within the 20-74 age group. In 156 of 179 total  
321 cases (87%), refried beans had been consumed.

322 Of 169 cases from which information was obtained, 88% reported vomiting,  
323 and more than half reported nausea and abdominal cramps (95 and 65%,  
324 respectively). However, in addition to vomiting, 38% of cases reported also diarrhea.  
325 Additional symptoms reported included (i) weakness (43%), (ii) chills (40%), (iii)  
326 dehydration (35%), (iv) headache (28%), (v) myalgia (muscle ache/pain; 16%), (vi)  
327 fever (16%), (vii) sweating (16%), and (viii) sore throat (3%). The incubation period  
328 observed for all cases ranged from 0.25-24 h, with a median of 2 h. The duration of  
329 illness ranged from 0.25 to 144 h, with a median estimate of 6 h.

330 A traceback was conducted, with the source of the outbreak determined to be a  
331 processing plant in Pennsylvania. The distributor in Pennsylvania packaged the  
332 refried beans specifically for the chain establishment where the outbreak occurred.  
333 The establishments where the outbreak occurred received 5 lb trays of pre-cooked,  
334 sealed, and frozen refried beans from the production/packaging facility. The refried  
335 beans would undergo cooking and a hot hold prior to consumption at the  
336 establishments where the outbreak occurred. It was determined that the refried beans  
337 were contaminated prior to preparation at the chain establishment.

338 Stool samples from suspect cases were cultured on MYP agar and *B. cereus*-  
339 like colonies were isolated from seven stool samples. Additionally, *B. cereus*-like  
340 colonies were isolated from nine food samples that were collected from five  
341 restaurants. In total, seven isolates from stool samples and 26 isolates from foods  
342 were confirmed to belong to the *B. cereus* group using standard microbiological  
343 methods. Isolates that were large Gram-positive rods, beta-hemolytic, and motile were  
344 presumptively identified as *B. cereus*-like. Additionally, spore staining was performed  
345 to differentiate between *B. cereus* and *B. thuringiensis*. All isolates were negative for  
346 the presence of parasporal crystals, therefore the isolates were classified as *B. cereus*.  
347 All 33 *B. cereus* group isolates underwent preliminary molecular characterization by  
348 Sanger sequencing of *rpoB*, which revealed two distinct allelic types belonging to  
349 phylogenetic clades III (*rpoB* allelic type 125; AT 125) and IV (AT 92).

#### 350 **3.2 WGS confirms presence of multiple *B. cereus* group species represented** 351 **among strains sequenced in association with the outbreak**

## **Bacillus cereus outbreak genomic sequencing**

352 *rpoB* allelic types (ATs) assigned *in silico* were identical to those obtained using  
353 Sanger sequencing for all 33 isolates (Table 3). *panC* clade assignment confirmed the  
354 presence of *B. cereus* from multiple clades (Table 3), with clade III (n = 30) and clade  
355 IV (n = 3) represented among the 33 isolates. *In silico* MLST further resolved the  
356 clade IV isolates into two sequence types (STs): the two strains isolated from refried  
357 beans served at two different restaurants had identical STs, while the single human  
358 isolate belonging to clade IV had a unique ST (Table 3). All 30 *panC* clade III isolates  
359 belonged to ST 26, including the remaining six human clinical isolates (Table 3).

360 The presence of isolates from multiple *B. cereus* group clades, as suggested by  
361 the *rpoB*, *panC*, and MLST loci among isolates sequenced in conjunction with this  
362 outbreak was confirmed using core SNPs detected in all outbreak isolates, as well as  
363 the genomes of 18 currently-recognized *B. cereus* group species (Figure 1). The three  
364 isolates assigned to *panC* clade IV using a 7-clade scheme (Guinebretiere et al., 2008)  
365 were most closely related to the *B. cereus s.s.* type strain (Figure 1). All three clade  
366 IV *B. cereus* isolates possessed diarrheal toxin genes *hblABCD* and *cytK2* at high  
367 identity and coverage (Figure 1), which code for enterotoxins hemolysin BL (Hbl)  
368 and cytotoxin K (CytK), respectively. The 30 isolates assigned to *panC* clade III,  
369 however, were most closely related to the type strain of *B. paranthracis* (Figure 1).  
370 Unlike *B. paranthracis*, all of the clade III isolates investigated here possessed the  
371 *cesABCD* operon (Figure 1), which codes for emetic toxin-producing cereulide  
372 synthetase (in the case of isolate HUMN\_10\_18\_16\_FECAL\_NA\_R9-6384, *cesD*  
373 was split onto two contigs), and were motile.

374 Based on average nucleotide identity (ANI) values, the three diarrheal clade IV  
375 isolates were classified as *B. cereus s.s.* (ANI > 95; Table 3). The 30 emetic clade III  
376 isolates, however, did not meet the minimum ANI cutoff of 95 used for assigning  
377 bacterial species relative to the *B. cereus s.s.* type strain. Of the 18 *B. cereus* group  
378 species as they are currently defined (Liu et al., 2017), the *B. paranthracis* type strain  
379 was closest to the 30 emetic clade III isolates from this outbreak (ANI > 95; Table 3),  
380 indicating that the emetic clade III and diarrheal clade IV isolates from this outbreak  
381 are different *B. cereus* group species.

### 382 **3.3 Emetic and diarrheal *B. cereus* isolates associated with the foodborne** 383 **outbreak do not differ in cytotoxicity**

384 All three diarrheal strains isolated in conjunction with the outbreak (FSL R9-  
385 6406, FSL R9-6410, and FSL R9-6413) were found to produce Hbl, as well as non-  
386 hemolytic enterotoxin (Nhe). Characterization of six representatives of the emetic  
387 isolates tested (i.e., FSL R9-6381, FSL R9-6382, FSL R9-6384, FSL R9-6389, FSL  
388 R9-6395, and FSL R9-6399) revealed that they produced Nhe, but not Hbl.  
389 Supernatants of diarrheal *B. cereus s.s.* ATCC 14579 showed stronger inhibitory  
390 effect on the viability of HeLa cells compared to supernatants of the 33 outbreak-  
391 associated isolates ( $P < 0.05$ ; Figure 2). Furthermore, the viability of HeLa cells  
392 treated with 0.05% Triton X-100, the positive control, was significantly lower  
393 compared to viability of HeLa cells treated with bacterial supernatants (Games-  
394 Howell  $P < 0.05$ ; Figure 2). Among all pairs of emetic isolates, only the viabilities of  
395 HeLa cells exposed to the supernatants of isolates FSL R9-6409 and FSL R9-6387  
396 were found to differ ( $P < 0.05$ ; Figure 2). The differences in HeLa cell viability after  
397 treatment with supernatants of these two emetic outbreak-associated strains are likely  
398 due to biological variability among replicates, as outbreak-associated emetic isolates

## ***Bacillus cereus* outbreak genomic sequencing**

399 were shown to be clonal (Figure 1). Taken together, the emetic group (represented by  
400 30 emetic outbreak-associated isolates) had a mean cell viability of  $97.5 \pm 5.1\%$ ,  
401 while the diarrheal group (represented by 3 diarrheal outbreak-associated isolates)  
402 gave a mean cell viability of  $101.4 \pm 7.9\%$ .

### **403 3.4 Core SNPs identified among *B. cereus* group outbreak isolates from two 404 clades are dependent on variant calling pipeline and reference genome 405 selection**

406 To simulate a scenario in which genomes from a *B. cereus* outbreak spanning  
407 multiple clades were analyzed in aggregate, core SNPs were identified in all 33  
408 outbreak isolates from clades III and IV ( $n = 30$  and 3 isolates, respectively) using (i)  
409 combinations of five reference-based variant calling pipelines (Table 1) and three  
410 different reference genomes (Table 2) and (ii) a reference-free SNP calling method  
411 (Table 1). When genomes from all 33 isolates were analyzed together, the numbers of  
412 SNPs identified by each pipeline and reference combination varied by up to several  
413 orders of magnitude (Figure 3A), often with little agreement between pipelines in  
414 terms of the SNPs they reported (Figure 4). Independent of reference genome, the  
415 CFSAN pipeline was the most conservative, consistently identifying the fewest  
416 number of core SNPs when all 33 isolates were queried in aggregate (50, 27, and 0  
417 core SNPs using reference genomes from clade III, IV, and VII, respectively) (Figure  
418 3A). This can be contrasted with the Samtools, Freebayes, and Parsnp pipelines,  
419 which produced upwards of 100,000 core SNPs when the selected reference genome  
420 was a member of one of the clades being queried in the outbreak isolate set (clade III  
421 and IV; Figure 3A). In cases where a distant genome was used as the reference (clade  
422 VII's *B. cytotoxicus* type strain chromosome), all reference-based pipelines reported  
423 fewer core SNPs than kSNP3's reference-free  $k$ -mer based SNP calling approach  
424 (Figure 3A).

### **426 3.5 Choice of variant calling pipeline has greater influence on core SNP 427 identification than choice of closely-related closed or draft reference 428 genome for emetic clade III *B. cereus* group isolates**

429 The 30 emetic clade III isolates were queried in the absence of their clade IV  
430 counterparts using combinations of five reference-based variant calling pipelines  
431 (Table 1) and two reference genomes (the closed chromosome of *B. cereus* str.  
432 AH187 and contigs of one of the isolates identified in this outbreak; Table 2) and one  
433 reference-free SNP calling method (Table 1). In this scenario, the choice of variant  
434 calling pipeline had a greater effect on the number of core SNPs obtained than the  
435 choice of reference genome, as both reference genomes possessed the same virulence  
436 gene profile (virulotype), *rpoB* AT, *panC* clade, MLST sequence type, and were of  
437 the same species (*B. paranthrasis* ANI > 95) as the 30 emetic isolates (Figure 3B).  
438 Congruent with this, the number of pairwise core SNP differences between emetic  
439 isolates sequenced in this outbreak varied more with the selection of variant calling  
440 pipeline than with reference genome (Figure 5). When the closed chromosome of *B.*  
441 *cereus* str. AH187 was used as a reference, pairwise core SNP differences among  
442 emetic isolates from this outbreak ranged from 0 to 8 (mean of 2.9; CFSAN), 7 to 29  
443 (mean of 16.1; Freebayes), 0 to 8 (mean of 2.8; LYVE-SET), 0 to 64 (mean of 23.6;  
444 Parsnp), and 1 to 16 SNPs (mean of 8.2; Samtools) (Figure 5). Using the reference-  
445 free kSNP3 pipeline, this range was 1 to 46 SNPs (mean of 16.7; Figure 5). The  
446 CFSAN and LYVE-SET pipelines produced nearly identical results in terms of the

## ***Bacillus cereus* outbreak genomic sequencing**

447 number and identity of the core SNPs called (23 and 22 SNPs, respectively; Figure 6),  
448 while the two methods that relied on assembled genomes rather than short reads for  
449 SNP calling (kSNP3 and Parsnp) produced the greatest numbers of core SNPs (Figure  
450 3B). The topologies of phylogenies constructed using core SNPs identified by each of  
451 the six pipelines also reflected this, as the topologies of the CFSAN/LYVE-SET and  
452 kSNP3/Parsnp pipelines were more similar to each other than what would be expected  
453 by chance (Table 4 and Figure 7).

454 Within the emetic clade III isolates associated with this outbreak, a total of 32  
455 core SNPs were identified by two or more of the reference-based variant calling  
456 pipelines when *B. cereus* str. AH187 was used as a reference, half of which were  
457 identified by all 5 pipelines (Figure 6). Out of these 32 SNPs, 23 were identified in  
458 protein coding genes, 14 of which produced non-synonymous amino acid changes  
459 (Supplementary Table S3). Genes with non-synonymous changes were involved in  
460 molybdopterin biosynthesis (WP\_000544623.1), proteolysis (WP\_000215096.1 and  
461 WP\_000857793.1), chitin binding (WP\_000795732.1), iron-hydroxamate transport  
462 (WP\_000728195.1), DNA repair (WP\_000947749.1 and WP\_000867556.1), DNA  
463 replication (WP\_000867556.1 and WP\_000435993.1), protein transport and insertion  
464 into the membrane (WP\_000727745.1), and glyoxylase/bleomycin resistance  
465 (WP\_000800664.1).

### 466 **3.6 Phylogenies constructed using core SNPs identified in 55 emetic ST 26 *B.*** 467 ***cereus* isolates by kSNP3 and Parsnp yield similar topologies**

468 To compare the 30 emetic strains from this outbreak to other emetic clade III  
469 isolates, all emetic clade III genomes with ST 26 were downloaded from NCBI. This  
470 produced a total of 55 emetic clade III isolates with ST 26 (30 isolates from this  
471 outbreak plus 25 from NCBI RefSeq). Among the 55 emetic ST 26 genomes, Parsnp  
472 identified almost twice as many core SNPs as kSNP3 (4,597 and 2,593 core SNPs,  
473 respectively). However, the topologies of phylogenies produced using the core SNPs  
474 identified by each pipeline were found to be more similar than would be expected by  
475 chance (Kendall-Colijn test  $P < 0.05$ ; Figure 8).

476 Based on pairwise core SNP differences, the publicly-available genomes  
477 showed greater variability than the outbreak isolates described here, regardless of  
478 whether kSNP3 or Parsnp was used for variant calling (ANOVA-like permutation test  
479  $P < 0.05$ ). Pairwise core SNP differences of the 30 emetic clade III isolates from this  
480 outbreak ranged from 0 to 25 SNPs (mean of 8.3) and 0 to 44 SNPs (mean of 11.9)  
481 when the kSNP3 and Parsnp pipelines were used, respectively. For external ST 26  
482 isolates not associated with this outbreak, pairwise core SNP differences ranged from  
483 0 to 1,474 SNPs (mean of 425.7) and 0 to 3,111 SNPs (mean of 828.3) when kSNP3  
484 and Parsnp were used, respectively. Between these two groups (the 30 emetic isolates  
485 from this outbreak and the 25 external emetic ST 26 isolates), pairwise core SNP  
486 differences ranged from 73 to 1,258 SNPs (mean of 301.7; kSNP3) and 74 to 2,709  
487 SNPs (mean of 528.0; Parsnp). Reflecting this, the average of the ranks of pairwise  
488 SNP distances within emetic isolates from this outbreak was less than the average of  
489 the ranks of pairwise SNP distances between the emetic isolates from this outbreak  
490 and the external ST 26 isolates (ANOSIM  $P < 0.05$ ). This is likely a result of the  
491 differences in variance between the outbreak and external ST 26 isolates, as supported  
492 by the results of the ANOVA-like permutation test (Anderson and Walsh, 2013).

## ***Bacillus cereus* outbreak genomic sequencing**

### 493 **4 Discussion**

494 While *B. cereus* causes a considerable number of foodborne illnesses cases  
495 annually, outbreaks are rarely investigated with the methodological vigor (e.g., use of  
496 WGS) that is increasingly used for surveillance and outbreak investigations targeting  
497 other foodborne pathogens. A specific challenge in the U.S. is that, unlike for some  
498 other diseases, disease cases caused by *B. cereus* are typically not reportable, even  
499 though foodborne illnesses, regardless of etiology, are reportable in some states,  
500 including NY. This, combined with the typically mild course of *B. cereus* infection,  
501 means that human *B. cereus* isolates are rarely available for WGS. Furthermore, even  
502 if clinical *B. cereus* group isolates are available, WGS may not be used for isolate  
503 characterization in cases where infections are mild. Due to the availability of *B.*  
504 *cereus* isolates for seven human cases, the outbreak reported here presented a unique  
505 opportunity to pilot the use of WGS for investigation of *B. cereus* outbreaks. The data  
506 and approaches presented here will not only facilitate future investigation of other *B.*  
507 *cereus* outbreaks, but will also help with application of WGS for investigation of  
508 other foodborne disease outbreaks where limited reference WGS data and information  
509 on genomic diversity are available.

#### 510 **4.1 Considerations for addressing the unique challenges associated with** 511 **characterization of foodborne outbreaks linked to the *B. cereus* group**

512 In *B. cereus* outbreaks, interpretation of WGS data can be challenging,  
513 especially in cases where strains of multiple closely related species or subtypes appear  
514 to be associated with an outbreak. *B. cereus* outbreaks—particularly emetic outbreaks  
515 caused by cereulide-producing *B. cereus* group isolates—are often associated with  
516 improper handling of food (e.g., temperature abuse) (Ehling-Schulz et al., 2004;  
517 Stenfors Arnesen et al., 2008). This, and their ubiquitous presence in the environment,  
518 make it important to consider the possibility of a multi-strain or multi-species  
519 outbreak in addition to a single-source outbreak caused by a single strain. In the  
520 outbreak characterized here, *B. cereus* group strains from two phylogenetic clades, III  
521 and IV, were isolated from both human clinical stool samples, as well as refried beans  
522 from food samples linked to the outbreak. The separation of outbreak-related isolates  
523 into three diarrheal clade IV isolates (representing two distinct STs) and 30 emetic  
524 isolates may be explained by one of the following scenarios: (i) the outbreak was  
525 caused by refried beans contaminated with multiple *B. cereus* group species (isolates  
526 from clades III and IV), both of which caused illness in humans, (ii) in addition to  
527 housing emetic outbreak strains that belonged to clade III, samples of refried beans  
528 and patient stool samples harbored clade IV *B. cereus* group isolates that were not  
529 part of the outbreak but were incidentally isolated from stool and food samples, or  
530 (iii) a subset of patient stool samples and food samples did not harbor *B. cereus* group  
531 clade III isolates belonging to the outbreak, but did harbor clade IV strains that were  
532 isolated and sequenced. In order to determine which of these scenarios explains the  
533 presence of multiple *B. cereus* species among isolates sequenced in conjunction with  
534 a foodborne outbreak, additional epidemiological and microbiological data are  
535 needed.

536 Valuable metrics for inclusion/exclusion of *B. cereus* group cases in a  
537 foodborne outbreak include patient exposure, patient symptoms (e.g., vomiting,  
538 diarrhea, onset and duration of illness), levels of *B. cereus* present in implicated food  
539 and patient samples (CFU/g or CFU/ml), cytotoxicity of isolates, and the approach

## ***Bacillus cereus* outbreak genomic sequencing**

540 used to select bacterial colonies to undergo WGS (e.g., Glasset et al., 2016  
541 recommend collecting at least five colonies representing a range of morphologies  
542 from each potentially contaminated food sample). However, some of these data may  
543 be more valuable than others: in their characterization of 564 *B. cereus* group strains  
544 associated with 140 “strong-evidence” foodborne outbreaks in France between 2007  
545 and 2014, Glasset, et al. (Glasset et al., 2016) found that patient symptoms could not  
546 be associated with the presence of emetic and diarrheal strains. More than half (57%)  
547 of the *B. cereus* outbreaks queried in their study included patients exhibiting both  
548 emetic and diarrheal symptoms. Similar results were observed here, as emetic and  
549 diarrheal symptoms were reported in 88 and 38% of cases, respectively, with both  
550 vomiting and diarrhea reported by multiple patients. While it has been proposed that  
551 this may be due to the fact that emetic clade III isolates have been shown to produce  
552 diarrheal enterotoxin Nhe at high levels (Glasset et al., 2016), incongruences between  
553 isolate virulotype and patient symptoms may still exist.

554 Another metric that can be used for determining whether *B. cereus* group  
555 isolates are part of an outbreak or not is the level of *B. cereus* present in the  
556 implicated food. Like patient symptoms, *B. cereus* counts from implicated foods may  
557 aid in an outbreak investigation, but likely cannot definitively prove whether an  
558 isolate is part of an outbreak or not. For example, outbreaks caused by implicated  
559 foods with *B. cereus* counts of  $< 10^3$  CFU/g and as low as 400 CFU/g for diarrheal  
560 and emetic diseases, respectively, have been described (Glasset et al., 2016), despite  
561 levels of at least  $10^5$ /g being often detected in implicated foods (Stenfors Arnesen et  
562 al., 2008). The levels of *B. cereus* present in refried beans in the outbreak described  
563 here were not determined. However, like patient symptoms, *B. cereus* count data may  
564 be a useful supplemental metric for characterizing outbreak isolates in the future.

565 Incubation period can also be used to determine whether an isolate is part of  
566 an outbreak or not, as it is significantly shorter for emetic strains than diarrheal strains  
567 (Ehling-Schulz et al., 2004; Stenfors Arnesen et al., 2008; Glasset et al., 2016). In the  
568 outbreak described here, the patient from which a non-emetic clade IV *B. cereus*  
569 group strain was isolated reported an incubation time of 1 h, the lowest incubation  
570 time of all seven confirmed human clinical cases. However, this is still within the  
571 observed range of incubation times for emetic *B. cereus* disease (0.5 – 6 h) (Stenfors  
572 Arnesen et al., 2008), making it possible that the patient could have been infected  
573 with either emetic *B. cereus* that was part of the outbreak but not isolated, or a  
574 pathogen which caused similar symptoms to foodborne illness caused by emetic *B.*  
575 *cereus*.

576 Cytotoxicity data may also be leveraged to include/exclude outbreak-  
577 associated *B. cereus* group isolates. In the outbreak described here, the patient from  
578 which a non-emetic clade IV *B. cereus* group strain was isolated reported vomiting  
579 and nausea and no diarrheal symptoms, despite the clinical isolate’s possession of  
580 multiple diarrheal toxin genes and no emetic toxin genes. This could suggest that the  
581 *B. cereus* group strain isolated from the patient was not responsible for the illness but  
582 may also indicate that our understanding of the specific virulence genes responsible  
583 for different *B. cereus*-associated disease symptoms is still incomplete. To further  
584 investigate this, we carried out immunoassay-based detection of Hbl and Nhe, as well  
585 as a WST-1 proliferation assay on HeLa cells exposed to bacterial supernatants  
586 presumably containing toxins. The results of Hbl and Nhe immunodetection and

## ***Bacillus cereus* outbreak genomic sequencing**

587 cytotoxicity revealed that diarrheal isolates only had mild detrimental effects on HeLa  
588 cell viability, despite the fact that they produced hemolysin BL and nonhemolytic  
589 enterotoxin. This can be contrasted with the *B. cereus* s.s. type strain, which  
590 substantially reduced the viability of the HeLa cells.

591 For the outbreak described here, results obtained using a combination of  
592 microbiological, epidemiological, and bioinformatic methods indicate that hypothesis  
593 (i), in which the diarrheal strains were part of a multi-species outbreak, can likely be  
594 excluded. Evidence supporting the conclusion that the human clinical diarrheal isolate  
595 was not part of the outbreak described here include: (i) the emetic symptoms reported  
596 by the patient were incongruent with the virulotype of the isolate, (ii) the isolate had a  
597 different ST compared to all other isolates sequenced in this outbreak, and (iii) the  
598 isolate did not exhibit substantial cytotoxicity against HeLa cells (Figure 2). This may  
599 be due to the fact that this case was not part of the outbreak and was due to an  
600 infection or intoxication caused by another pathogen that leads to disease symptoms  
601 similar to *B. cereus* (e.g., *Staphylococcus aureus*), or that this person was an  
602 asymptomatic carrier of clade IV *B. cereus* (Ghosh, 1978; Turnbull and Kramer,  
603 1985) that was isolated and sequenced instead of the clade III emetic outbreak isolate.

604 While we have shown here that WGS data can be a valuable tool for  
605 characterizing *B. cereus* group isolates from a foodborne outbreak, our results also  
606 showcase the importance of supplementing WGS data with epidemiological metadata  
607 to draw meaningful conclusions from *B. cereus* group genomic data. Furthermore, the  
608 availability of WGS and cytotoxicity data from a larger set of *B. cereus* isolates from  
609 symptomatic patients may also provide an opportunity to use comparative genomics  
610 approaches to further explore virulence genes that are linked to different disease  
611 outcomes in the future.

### **612 4.2 Recommendations for analyzing Illumina WGS data from *B. cereus* group 613 isolates potentially linked to a foodborne outbreak**

614 WGS is being used increasingly to characterize isolates associated with  
615 foodborne disease cases and outbreaks, and rightfully so: it offers the ability to  
616 characterize foodborne pathogens at unprecedented resolution, and it has been able to  
617 improve outbreak and cluster detection for numerous foodborne pathogens (Allard et  
618 al., 2017; Kovac et al., 2017; Moran-Gilad, 2017; Taboada et al., 2017), including  
619 *Salmonella enterica* (Taylor et al., 2015; Hoffmann et al., 2016; Gymoese et al.,  
620 2017), *Escherichia coli* (Grad et al., 2012; Holmes et al., 2015; Rusconi et al., 2016),  
621 and *Listeria monocytogenes* (Jackson et al., 2016; Kwong et al., 2016; Chen et al.,  
622 2017a; Chen et al., 2017b; Moura et al., 2017). However, as demonstrated here and  
623 elsewhere (Pightling et al., 2014; Hwang et al., 2015; Pightling et al., 2015; Katz et  
624 al., 2017; Sandmann et al., 2017), the choice of variant calling pipeline can influence  
625 the identification of SNPs in WGS data. This can be particularly problematic for  
626 outbreak and cluster detection in bacterial pathogen surveillance: despite the issues  
627 that come with using pairwise SNP difference cutoffs to determine which isolates are  
628 included and excluded in an outbreak or cluster (McCloskey and Poon, 2017), SNP  
629 thresholds are currently widely used to make initial decisions on the inclusion or  
630 exclusion of isolates in a given outbreak (Taylor et al., 2015; Gymoese et al., 2017;  
631 Mair-Jenkins et al., 2017; Walker et al., 2018). In such scenarios, just a few SNPs can  
632 be the deciding factor in whether a bacterial pathogen is included or excluded as part  
633 of an outbreak or cluster (Katz et al., 2017), rendering the choice of variant calling

## ***Bacillus cereus* outbreak genomic sequencing**

634 method as non-trivial. Choosing an appropriate variant calling pipeline can be  
635 particularly challenging for pathogens where there are limited data and expertise with  
636 WGS (e.g., as is currently the case with *B. cereus*).

637 As demonstrated here, the choice of variant calling pipeline can greatly  
638 influence the number of core SNPs identified in *B. cereus* group isolates associated  
639 with a foodborne outbreak. In the case of a multi-clade outbreak, this effect can be  
640 magnified: naively calling variants in isolates that span multiple *B. cereus* group  
641 clades in aggregate can lead to orders of magnitudes of difference in the number of  
642 core SNPs identified by different variant calling pipelines/reference genome  
643 combinations. In a multi-clade outbreak scenario, it is essential to note that one is  
644 effectively dealing with genomic data from *multiple species* (i.e., ANI < 95), making  
645 it impossible to find a reference genome that is closely related to all isolates in the  
646 outbreak. In the case of some reference-based pipelines that are specifically tailored to  
647 identify variants in bacterial isolates from outbreaks (e.g., CFSAN, which is not  
648 suited for bacteria differing by more than a few hundred SNPs), calling variants in  
649 multiple clades or within a distant reference genome is inappropriate (Davis et al.,  
650 2015). Thus, querying outbreak isolates from multiple clades in aggregate using  
651 reference-based variant calling methods should be avoided. Furthermore, the results  
652 presented here showcase the value of employing single- and/or multi-locus typing  
653 approaches prior to variant calling, either via Sanger sequencing or *in silico* using  
654 tools such as BTypper, as they can aid the design of downstream bioinformatics  
655 analyses (e.g., reference genome selection, data partitioning by clade).

656 When the three clade IV isolates were excluded from analyses, leaving only  
657 the emetic clade III isolates, the selection of reference genome caused fewer core SNP  
658 discrepancies than choice of variant calling pipeline, provided the reference genome  
659 was “similar” to the genomes analyzed. While the selection of a reference genome for  
660 reference-based variant calling is not trivial (Pightling et al., 2014; Olson et al., 2015),  
661 reference-based variant calling using a closed chromosome (*B. cereus* str. AH187)  
662 and a draft genome (FOOD\_10\_19\_16\_RSNT1\_2H\_R9-6393) from two isolates that  
663 were closely related to or among the emetic clade III isolates sequenced in this  
664 outbreak produced nearly identical results in terms of the number and identity of  
665 SNPs detected. Both reference genomes were identical to the emetic clade III  
666 outbreak isolates sequenced here in terms of *panC* clade, *rpoB* AT, MLST ST, and  
667 virulotype. Additionally, the closed chromosome and draft genome had ANI values  
668 of > 99.8 and 99.9 relative to all emetic clade III outbreak isolates, respectively.  
669 Similar findings have been observed in *Salmonella enterica* serovar Heidelberg  
670 (Usongo et al., 2018), suggesting that either closed genomes or high-quality draft  
671 genomes are adequate for reference-based SNP calling, provided both are similar  
672 enough to the outbreak strains being queried.

673 With regard to differences in the number of core SNPs identified in the 30  
674 emetic clade III isolates using different variant calling pipelines, the pipelines that  
675 used assembled genomes as input (kSNP3 and Parsnp) produced higher numbers of  
676 core SNPs than their counterparts that relied on short Illumina reads. Additionally,  
677 both kSNP3 and Parsnp produced core SNPs that produced topologically similar  
678 phylogenies. kSNP3 employs a reference-free *k*-mer based SNP calling approach  
679 (Gardner and Hall, 2013; Gardner et al., 2015), while Parsnp uses a reference-based  
680 core genome alignment approach (Treangen et al., 2014), and both are useful for



## **Bacillus cereus outbreak genomic sequencing**

681 calling variants in large data sets. These approaches are also valuable when reads are  
682 not available for SNP calling (Olson et al., 2015), as demonstrated here by the  
683 comparison of outbreak genomes with publicly-available genomes: core SNPs  
684 obtained using both kSNP3 and Parsnp were able to consistently produce phylogenies  
685 in which the 30 emetic isolates from this outbreak formed a well-supported clade  
686 among all emetic ST 26 *B. cereus* group genomes. However, kSNP3 has been shown  
687 to lack specificity relative to other pipelines (i.e., CFSAN, LYVE-SET) when  
688 differentiating outbreak isolates from non-outbreak isolates for *L. monocytogenes*, *E.*  
689 *coli*, and *S. enterica* (Katz et al., 2017). Here, the CFSAN and LYVE-SET pipelines  
690 identified similar SNPs that produced highly congruent phylogenies. This is  
691 unsurprising, considering both the CFSAN and LYVE-SET pipelines were designed  
692 specifically for identifying SNPs in closely-related strains from outbreaks (Katz et al.,  
693 2017), and both employ the most stringent filtering criteria of all pipelines tested here.

### 694 **4.3 As WGS becomes routinely integrated into food safety, clinical, and** 695 **epidemiological realms, it is likely that the number of illnesses attributed to** 696 ***B. cereus* will increase**

697 Here, we offer the first description of a foodborne outbreak caused by *B. cereus*  
698 group species to be characterized using WGS, and we provide a glimpse into the  
699 genomic variation one might expect within an emetic clade III *B. cereus* outbreak  
700 using several different variant calling pipelines. However, our ability to query emetic  
701 clade III genomes outside of this outbreak is limited by the lack of publicly-available  
702 genomic data and metadata from emetic isolates. Of the 2,156 *B. cereus* group  
703 genomes available in NCBI's RefSeq database in March 2018, only 29 were from  
704 clade III and possessed the *cesABCD* operon, 25 of which belonged to ST 26. While  
705 not ideal, this is an improvement, as there were only 19 emetic clade III genomes  
706 available in NCBI's Genbank database in April 2017 (Carroll et al., 2017). As more  
707 *B. cereus* group WGS data—particularly, data from emetic *B. cereus* group isolates—  
708 become publicly available, more outbreaks and clusters are likely to be resolved in  
709 tandem, a phenomenon that has been observed for *L. monocytogenes* (Jackson et al.,  
710 2016). Additionally, variant calling and cluster/outbreak detection methods for  
711 characterizing *B. cereus* group isolates from foodborne outbreaks can be further  
712 refined and optimized as more data and metadata are available for clinical and non-  
713 clinical isolates.

## 714 **5 Author Contributions**

715 LC performed computational analyses; MM, LM, ND, and JC performed  
716 microbiological experiments. DN provided and interpreted epidemiological data. MW  
717 and JK conceived the study. LC, MW, and JK co-wrote the manuscript.

## 718 **6 Funding**

719 This material is based on work supported by the National Science Foundation  
720 Graduate Research Fellowship Program under grant no. DGE-1144153. This work  
721 was supported also by the USDA National Institute of Food and Hatch Appropriations  
722 under Project #PEN04646 and Accession #1015787.

## 723 **7 Conflict of Interest**

## **Bacillus cereus outbreak genomic sequencing**

724 The authors declare that the research was conducted in the absence of any  
725 commercial or financial relationships that could be construed as a potential conflict of  
726 interest.

### 727 **8 Acknowledgments**

728 The authors would like to acknowledge the Wadsworth Center Tissue Culture &  
729 Media Core for providing the media used in this work, and Dr. Joshua Lambert from  
730 The Pennsylvania State University for providing tissue culture laboratory facility and  
731 advising.

### 732 **9 References**

- 733 Allard, M.W., Bell, R., Ferreira, C.M., Gonzalez-Escalona, N., Hoffmann, M.,  
734 Muruvanda, T., et al. (2017). Genomics of foodborne pathogens for microbial  
735 food safety. *Curr Opin Biotechnol* 49, 224-229. doi:  
736 10.1016/j.copbio.2017.11.002.
- 737 Anderson, M.J., and Walsh, D.C.I. (2013). PERMANOVA, ANOSIM, and the Mantel  
738 test in the face of heterogeneous dispersions: What null hypothesis are you  
739 testing? *Ecological Monographs* 83(4), 557-574. doi: 10.1890/12-2010.1.
- 740 Ashton, P., Nair, S., Peters, T., Tewolde, R., Day, M., Doumith, M., et al. (2015).  
741 Revolutionising Public Health Reference Microbiology using Whole Genome  
742 Sequencing: *Salmonella* as an exemplar. *bioRxiv*. doi: 10.1101/033225.
- 743 Bankevich, A., Nurk, S., Antipov, D., Gurevich, A.A., Dvorkin, M., Kulikov, A.S., et  
744 al. (2012). SPAdes: a new genome assembly algorithm and its applications to  
745 single-cell sequencing. *J Comput Biol* 19(5), 455-477. doi:  
746 10.1089/cmb.2012.0021.
- 747 Bennett, S.D., Walsh, K.A., and Gould, L.H. (2013). Foodborne disease outbreaks  
748 caused by *Bacillus cereus*, *Clostridium perfringens*, and *Staphylococcus*  
749 *aureus*--United States, 1998-2008. *Clin Infect Dis* 57(3), 425-433. doi:  
750 10.1093/cid/cit244.
- 751 Bolger, A.M., Lohse, M., and Usadel, B. (2014). Trimmomatic: a flexible trimmer for  
752 Illumina sequence data. *Bioinformatics* 30(15), 2114-2120. doi:  
753 10.1093/bioinformatics/btu170.
- 754 Bruen, T.C., Philippe, H., and Bryant, D. (2006). A simple and robust statistical test  
755 for detecting the presence of recombination. *Genetics* 172(4), 2665-2681. doi:  
756 10.1534/genetics.105.048975.
- 757 Carroll, L.M., Kovac, J., Miller, R.A., and Wiedmann, M. (2017). Rapid, high-  
758 throughput identification of anthrax-causing and emetic *Bacillus cereus* group  
759 genome assemblies using BTyper, a computational tool for virulence-based  
760 classification of *Bacillus cereus* group isolates using nucleotide sequencing  
761 data. *Appl Environ Microbiol*. doi: 10.1128/AEM.01096-17.
- 762 Chen, Y., Luo, Y., Curry, P., Timme, R., Melka, D., Doyle, M., et al. (2017a).  
763 Assessing the genome level diversity of *Listeria monocytogenes* from  
764 contaminated ice cream and environmental samples linked to a listeriosis  
765 outbreak in the United States. *PLoS One* 12(2), e0171389. doi:  
766 10.1371/journal.pone.0171389.
- 767 Chen, Y., Luo, Y., Pettengill, J., Timme, R., Melka, D., Doyle, M., et al. (2017b).  
768 Singleton Sequence Type 382, an Emerging Clonal Group of *Listeria*  
769 *monocytogenes* Associated with Three Multistate Outbreaks Linked to

## ***Bacillus cereus* outbreak genomic sequencing**

- 770 Contaminated Stone Fruit, Caramel Apples, and Leafy Green Salad. *J Clin*  
771 *Microbiol* 55(3), 931-941. doi: 10.1128/JCM.02140-16.
- 772 Clarke, K.R. (1993). Non-parametric multivariate analysis of changes in community  
773 structure. *Australian Journal of Ecology* 18, 117-143. doi:10.1111/j.1442-  
774 9993.1993.tb00438.x.
- 775 Croucher, N.J., Page, A.J., Connor, T.R., Delaney, A.J., Keane, J.A., Bentley, S.D., et  
776 al. (2015). Rapid phylogenetic analysis of large samples of recombinant  
777 bacterial whole genome sequences using Gubbins. *Nucleic Acids Res* 43(3),  
778 e15. doi: 10.1093/nar/gku1196.
- 779 Danecek, P., Auton, A., Abecasis, G., Albers, C.A., Banks, E., DePristo, M.A., et al.  
780 (2011). The variant call format and VCFtools. *Bioinformatics* 27(15), 2156-  
781 2158. doi: 10.1093/bioinformatics/btr330.
- 782 Davis, S., Pettengill, J.B., Luo, Y., Payne, J., Shpuntoff, A., Rand, H., et al. (2015).  
783 CFSAN SNP Pipeline: an automated method for constructing SNP matrices  
784 from next-generation sequence data. *PeerJ Computer Science* 1:e20  
785 <https://doi.org/10.7717/peerj-cs.20>.
- 786 de Jonge, E. (2016). docopt: Command-Line Interface Specification Language. R  
787 package version 0.4.5. <https://CRAN.R-project.org/package=docopt>.
- 788 Ehling-Schulz, M., Fricker, M., and Scherer, S. (2004). *Bacillus cereus*, the causative  
789 agent of an emetic type of food-borne illness. *Mol Nutr Food Res* 48(7), 479-  
790 487. doi: 10.1002/mnfr.200400055.
- 791 Fisichella, M., Dabboue, H., Bhattacharyya, S., Saboungi, M.L., Salvetat, J.P., Hevor,  
792 T., et al. (2009). Mesoporous silica nanoparticles enhance MTT formazan  
793 exocytosis in HeLa cells and astrocytes. *Toxicol In Vitro* 23(4), 697-703. doi:  
794 10.1016/j.tiv.2009.02.007.
- 795 Gardner, S.N., and Hall, B.G. (2013). When whole-genome alignments just won't  
796 work: kSNP v2 software for alignment-free SNP discovery and phylogenetics  
797 of hundreds of microbial genomes. *PLoS One* 8(12), e81760. doi:  
798 10.1371/journal.pone.0081760.
- 799 Gardner, S.N., Slezak, T., and Hall, B.G. (2015). kSNP3.0: SNP detection and  
800 phylogenetic analysis of genomes without genome alignment or reference  
801 genome. *Bioinformatics* 31(17), 2877-2878. doi:  
802 10.1093/bioinformatics/btv271.
- 803 Garrison, E. and Marth, G. (2012). Haplotype-based variant detection from short-read  
804 sequencing. *arXiv preprint arXiv:1207.3907 [q-bio.GN]*.
- 805 Ghosh, A.C. (1978). Prevalence of *Bacillus cereus* in the faeces of healthy adults. *J*  
806 *Hyg (Lond)* 80(2), 233-236.
- 807 Glasset, B., Herbin, S., Guillier, L., Cadel-Six, S., Vignaud, M.L., Grout, J., et al.  
808 (2016). *Bacillus cereus*-induced food-borne outbreaks in France, 2007 to  
809 2014: epidemiology and genetic characterisation. *Euro Surveill* 21(48). doi:  
810 10.2807/1560-7917.ES.2016.21.48.30413.
- 811 Grad, Y.H., Lipsitch, M., Feldgarden, M., Arachchi, H.M., Cerqueira, G.C.,  
812 Fitzgerald, M., et al. (2012). Genomic epidemiology of the *Escherichia coli*  
813 O104:H4 outbreaks in Europe, 2011. *Proc Natl Acad Sci U S A* 109(8), 3065-  
814 3070. doi: 10.1073/pnas.1121491109.
- 815 Granum, P.E., and Lund, T. (1997). *Bacillus cereus* and its food poisoning toxins.  
816 *FEMS Microbiol Lett* 157(2), 223-228.
- 817 Guangchuang, Y., K., S.D., Huachen, Z., Yi, G., and Tsan-Yuk, L.T. (2017). ggtree:  
818 an r package for visualization and annotation of phylogenetic trees with their

## ***Bacillus cereus* outbreak genomic sequencing**

- 819 covariates and other associated data. *Methods in Ecology and Evolution* 8(1),  
820 28-36. doi: doi:10.1111/2041-210X.12628.
- 821 Guinebretiere, M.H., Thompson, F.L., Sorokin, A., Normand, P., Dawyndt, P.,  
822 Ehling-Schulz, M., et al. (2008). Ecological diversification in the *Bacillus*  
823 *cereus* Group. *Environ Microbiol* 10(4), 851-865. doi: 10.1111/j.1462-  
824 2920.2007.01495.x.
- 825 Gyomose, P., Sorensen, G., Litrup, E., Olsen, J.E., Nielsen, E.M., and Torpdahl, M.  
826 (2017). Investigation of Outbreaks of *Salmonella enterica* Serovar  
827 Typhimurium and Its Monophasic Variants Using Whole-Genome  
828 Sequencing, Denmark. *Emerg Infect Dis* 23(10), 1631-1639. doi:  
829 10.3201/eid2310.161248.
- 830 Heibl, C. 2008. PHYLOCH: R language tree plotting tools and interfaces to diverse  
831 phylogenetic software packages.  
832 <http://www.christophheibl.de/Rpackages.html>.
- 833 Hoffmann, M., Luo, Y., Monday, S.R., Gonzalez-Escalona, N., Ottesen, A.R.,  
834 Muruvanda, T., et al. (2016). Tracing Origins of the *Salmonella* Bareilly  
835 Strain Causing a Food-borne Outbreak in the United States. *J Infect Dis*  
836 213(4), 502-508. doi: 10.1093/infdis/jiv297.
- 837 Holmes, A., Allison, L., Ward, M., Dallman, T.J., Clark, R., Fawkes, A., et al. (2015).  
838 Utility of Whole-Genome Sequencing of *Escherichia coli* O157 for Outbreak  
839 Detection and Epidemiological Surveillance. *J Clin Microbiol* 53(11), 3565-  
840 3573. doi: 10.1128/JCM.01066-15.
- 841 Hwang, S., Kim, E., Lee, I., and Marcotte, E.M. (2015). Systematic comparison of  
842 variant calling pipelines using gold standard personal exome variants. *Sci Rep*  
843 5, 17875. doi: 10.1038/srep17875.
- 844 Ivy, R.A., Ranieri, M.L., Martin, N.H., den Bakker, H.C., Xavier, B.M., Wiedmann,  
845 M., et al. (2012). Identification and characterization of psychrotolerant  
846 sporeformers associated with fluid milk production and processing. *Appl*  
847 *Environ Microbiol* 78(6), 1853-1864. doi: 10.1128/AEM.06536-11.
- 848 Jackson, B.R., Tarr, C., Strain, E., Jackson, K.A., Conrad, A., Carleton, H., et al.  
849 (2016). Implementation of Nationwide Real-time Whole-genome Sequencing  
850 to Enhance Listeriosis Outbreak Detection and Investigation. *Clin Infect Dis*  
851 63(3), 380-386. doi: 10.1093/cid/ciw242.
- 852 Jain, C., Rodriguez-R, L.M., Phillippy, A.M., Konstantinidis, K.T., and Aluru, S.  
853 (2017). High-throughput ANI Analysis of 90K Prokaryotic Genomes Reveals  
854 Clear Species Boundaries. bioRxiv 225342.  
855 doi: <https://doi.org/10.1101/225342>.
- 856 Joensen, K.G., Scheutz, F., Lund, O., Hasman, H., Kaas, R.S., Nielsen, E.M., et al.  
857 (2014). Real-time whole-genome sequencing for routine typing, surveillance,  
858 and outbreak detection of verotoxigenic *Escherichia coli*. *J Clin Microbiol*  
859 52(5), 1501-1510. doi: 10.1128/JCM.03617-13.
- 860 Jombart, T., Kendall, M., Almagro-Garcia, J., and Colijn, C. (2017). Treespace:  
861 Statistical exploration of landscapes of phylogenetic trees. *Mol Ecol Resour*  
862 17(6), 1385-1392. doi: 10.1111/1755-0998.12676
- 863 Katz, L.S., Griswold, T., Williams-Newkirk, A.J., Wagner, D., Petkau, A., Sieffert,  
864 C., et al. (2017). A Comparative Analysis of the Lyve-SET Phylogenomics  
865 Pipeline for Genomic Epidemiology of Foodborne Pathogens. *Front Microbiol*  
866 8, 375. doi: 10.3389/fmicb.2017.00375.
- 867 Kendall, M. and Colijn, C. (2015). A tree metric using structure and length to capture  
868 distinct phylogenetic signals. *arXiv:1507.05211v3 [q-bio.PE]*.

## ***Bacillus cereus* outbreak genomic sequencing**

- 869 Kovac, J., Bakker, H.d., Carroll, L.M., and Wiedmann, M. (2017). Precision food  
870 safety: A systems approach to food safety facilitated by genomics tools. *TrAC*  
871 *Trends in Analytical Chemistry* 96, 52-61. doi:  
872 <https://doi.org/10.1016/j.trac.2017.06.001>.
- 873 Kovac, J., Miller, R.A., Carroll, L.M., Kent, D.J., Jian, J., Beno, S.M., et al. (2016).  
874 Production of hemolysin BL by *Bacillus cereus* group isolates of dairy origin  
875 is associated with whole-genome phylogenetic clade. *BMC Genomics* 17, 581.  
876 doi: 10.1186/s12864-016-2883-z.
- 877 Kwong, J.C., Mercoulia, K., Tomita, T., Easton, M., Li, H.Y., Bulach, D.M., et al.  
878 (2016). Prospective Whole-Genome Sequencing Enhances National  
879 Surveillance of *Listeria monocytogenes*. *J Clin Microbiol* 54(2), 333-342. doi:  
880 10.1128/JCM.02344-15.
- 881 Lewis, P.O. (2001). A likelihood approach to estimating phylogeny from discrete  
882 morphological character data. *Syst Biol* 50(6), 913-925.
- 883 Li, H. (2013). Aligning sequence reads, clone sequences and assembly contigs with  
884 BWA-MEM. *arXiv:1303.3997v1 [q-bio.GN]*.
- 885 Li, H., and Durbin, R. (2010). Fast and accurate long-read alignment with Burrows-  
886 Wheeler transform. *Bioinformatics* 26(5), 589-595. doi:  
887 10.1093/bioinformatics/btp698.
- 888 Li, H., Handsaker, B., Wysoker, A., Fennell, T., Ruan, J., Homer, N., et al. (2009).  
889 The Sequence Alignment/Map format and SAMtools. *Bioinformatics* 25(16),  
890 2078-2079. doi: 10.1093/bioinformatics/btp352.
- 891 Liu, Y., Du, J., Lai, Q., Zeng, R., Ye, D., Xu, J., et al. (2017). Proposal of nine novel  
892 species of the *Bacillus cereus* group. *Int J Syst Evol Microbiol* 67(8), 2499-  
893 2508. doi: 10.1099/ijsem.0.001821.
- 894 Lotte, R., Herisse, A.L., Berrouane, Y., Lotte, L., Casagrande, F., Landraud, L., et al.  
895 (2017). Virulence Analysis of *Bacillus cereus* Isolated after Death of Preterm  
896 Neonates, Nice, France, 2013. *Emerg Infect Dis* 23(5), 845-848. doi:  
897 10.3201/eid2305.161788.
- 898 Mair-Jenkins, J., Borges-Stewart, R., Harbour, C., Cox-Rogers, J., Dallman, T.,  
899 Ashton, P., et al. (2017). Investigation using whole genome sequencing of a  
900 prolonged restaurant outbreak of *Salmonella* Typhimurium linked to the  
901 building drainage system, England, February 2015 to March 2016. *Euro*  
902 *Surveill* 22(49). doi: 10.2807/1560-7917.ES.2017.22.49.17-00037.
- 903 McCloskey, R.M., and Poon, A.F.Y. (2017). A model-based clustering method to  
904 detect infectious disease transmission outbreaks from sequence variation.  
905 *PLoS Comput Biol* 13(11), e1005868. doi: 10.1371/journal.pcbi.1005868.
- 906 Miller, R.A., Jian, J., Beno, S.M., Wiedmann, M., and Kovac, J. (2018). Intracode  
907 Variability in Toxin Production and Cytotoxicity of *Bacillus cereus* Group  
908 Type Strains and Dairy-Associated Isolates. *Appl Environ Microbiol* 84(6).  
909 doi: 10.1128/AEM.02479-17.
- 910 Moran-Gilad, J. (2017). Whole genome sequencing (WGS) for food-borne pathogen  
911 surveillance and control - taking the pulse. *Euro Surveill* 22(23). doi:  
912 10.2807/1560-7917.ES.2017.22.23.30547.
- 913 Moura, A., Tourdjman, M., Leclercq, A., Hamelin, E., Laurent, E., Fredriksen, N., et  
914 al. (2017). Real-Time Whole-Genome Sequencing for Surveillance of *Listeria*  
915 *monocytogenes*, France. *Emerg Infect Dis* 23(9), 1462-1470. doi:  
916 10.3201/eid2309.170336.
- 917 Naranjo, M., Denayer, S., Botteldoorn, N., Delbrassinne, L., Veys, J., Waegenaere, J.,  
918 et al. (2011). Sudden death of a young adult associated with *Bacillus cereus*

## ***Bacillus cereus* outbreak genomic sequencing**

- 919 food poisoning. *J Clin Microbiol* 49(12), 4379-4381. doi:  
920 10.1128/JCM.05129-11.
- 921 Olson, N.D., Lund, S.P., Colman, R.E., Foster, J.T., Sahl, J.W., Schupp, J.M., et al.  
922 (2015). Best practices for evaluating single nucleotide variant calling methods  
923 for microbial genomics. *Front Genet* 6, 235. doi: 10.3389/fgene.2015.00235.
- 924 Oksanen, J., Blanchet, F.G., Friendly, M., Kindt, R., Legendre, P., McGlinn, D., et al.  
925 (2018). vegan: Community Ecology Package. R package version 2.5-2.  
926 <https://CRAN.R-project.org/package=vegan>.
- 927 Paradis, E., Claude, J., and Strimmer, K. (2004). APE: Analyses of Phylogenetics and  
928 Evolution in R language. *Bioinformatics* 20(2), 289-290.
- 929 Pightling, A.W., Petronella, N., and Pagotto, F. (2014). Choice of reference sequence  
930 and assembler for alignment of *Listeria monocytogenes* short-read sequence  
931 data greatly influences rates of error in SNP analyses. *PLoS One* 9(8),  
932 e104579. doi: 10.1371/journal.pone.0104579.
- 933 Pightling, A.W., Petronella, N., and Pagotto, F. (2015). Choice of reference-guided  
934 sequence assembler and SNP caller for analysis of *Listeria monocytogenes*  
935 short-read sequence data greatly influences rates of error. *BMC Res Notes* 8,  
936 748. doi: 10.1186/s13104-015-1689-4.
- 937 Pruitt, K.D., Tatusova, T., and Maglott, D.R. (2007). NCBI reference sequences  
938 (RefSeq): a curated non-redundant sequence database of genomes, transcripts  
939 and proteins. *Nucleic Acids Res* 35(Database issue), D61-65. doi:  
940 10.1093/nar/gkl842.
- 941 R Core Team. (2018). R: A language and environment for statistical computing. R  
942 Foundation for Statistical Computing, Vienna, Austria. [https://www.R-](https://www.R-project.org/)  
943 [project.org/](https://www.R-project.org/).
- 944 R Hackathon, et al. (2017). phylobase: Base Package for Phylogenetic Structures and  
945 Comparative Data. R package version 0.8.4. [https://CRAN.R-](https://CRAN.R-project.org/package=phylobase)  
946 [project.org/package=phylobase](https://CRAN.R-project.org/package=phylobase).
- 947 Revell, L.J. (2012). phytools: An R package for phylogenetic comparative biology  
948 (and other things). *Methods Ecol Evol* 3, 217-223. doi:10.1111/j.2041-  
949 210X.2011.00169.x.
- 950 Rusconi, B., Sanjar, F., Koenig, S.S., Mammel, M.K., Tarr, P.I., and Eppinger, M.  
951 (2016). Whole Genome Sequencing for Genomics-Guided Investigations of  
952 *Escherichia coli* O157:H7 Outbreaks. *Front Microbiol* 7, 985. doi:  
953 10.3389/fmicb.2016.00985.
- 954 Sanaei-Zadeh, H. (2012). Can *Bacillus cereus* food poisoning cause sudden death? *J*  
955 *Clin Microbiol* 50(11), 3816; author reply 3817. doi: 10.1128/JCM.00059-12.
- 956 Sandmann, S., de Graaf, A.O., Karimi, M., van der Reijden, B.A., Hellstrom-  
957 Lindberg, E., Jansen, J.H., et al. (2017). Evaluating Variant Calling Tools for  
958 Non-Matched Next-Generation Sequencing Data. *Sci Rep* 7, 43169. doi:  
959 10.1038/srep43169.
- 960 Scallan, E., Hoekstra, R.M., Angulo, F.J., Tauxe, R.V., Widdowson, M.A., Roy, S.L.,  
961 et al. (2011). Foodborne illness acquired in the United States--major  
962 pathogens. *Emerg Infect Dis* 17(1), 7-15. doi: 10.3201/eid1701.P11101  
963 10.3201/eid1701.091101p1.
- 964 Schliep, K.P. (2011). phangorn: phylogenetic analysis in R. *Bioinformatics* 27(4),  
965 592-593. <https://doi.org/10.1093/bioinformatics/btq706>
- 966 Schoeni, J.L., and Wong, A.C. (2005). *Bacillus cereus* food poisoning and its toxins.  
967 *J Food Prot* 68(3), 636-648.

## ***Bacillus cereus* outbreak genomic sequencing**

- 968 Stamatakis, A. (2014). RAxML version 8: a tool for phylogenetic analysis and post-  
969 analysis of large phylogenies. *Bioinformatics* 30(9), 1312-1313. doi:  
970 10.1093/bioinformatics/btu033.
- 971 Stenfors Arnesen, L.P., Fagerlund, A., and Granum, P.E. (2008). From soil to gut:  
972 *Bacillus cereus* and its food poisoning toxins. *FEMS Microbiol Rev* 32(4),  
973 579-606. doi: 10.1111/j.1574-6976.2008.00112.x.
- 974 Taboada, E.N., Graham, M.R., Carrico, J.A., and Van Domselaar, G. (2017). Food  
975 Safety in the Age of Next Generation Sequencing, Bioinformatics, and Open  
976 Data Access. *Front Microbiol* 8, 909. doi: 10.3389/fmicb.2017.00909.
- 977 Tallent, S.M., Rhodehamel, E.J., Harmon, S.M., and Bennett, R.W. (2012). "Chapter  
978 14: *Bacillus cereus*," in *Bacteriological Analytical Manual*. (Silver Spring,  
979 MD: U.S. Food and Drug Administration).
- 980 Taylor, A.J., Lappi, V., Wolfgang, W.J., Lapierre, P., Palumbo, M.J., Medus, C., et al.  
981 (2015). Characterization of Foodborne Outbreaks of *Salmonella enterica*  
982 Serovar Enteritidis with Whole-Genome Sequencing Single Nucleotide  
983 Polymorphism-Based Analysis for Surveillance and Outbreak Detection. *J*  
984 *Clin Microbiol* 53(10), 3334-3340. doi: 10.1128/JCM.01280-15.
- 985 Treangen, T.J., Ondov, B.D., Koren, S., and Phillippy, A.M. (2014). The Harvest  
986 suite for rapid core-genome alignment and visualization of thousands of  
987 intraspecific microbial genomes. *Genome Biol* 15(11), 524. doi:  
988 10.1186/PREACCEPT-2573980311437212.
- 989 Turnbull, P.C., and Kramer, J.M. (1985). Intestinal carriage of *Bacillus cereus*: faecal  
990 isolation studies in three population groups. *J Hyg (Lond)* 95(3), 629-638.
- 991 Usongo, V., Berry, C., Yousfi, K., Doualla-Bell, F., Labbe, G., Johnson, R., et al.  
992 (2018). Impact of the choice of reference genome on the ability of the core  
993 genome SNV methodology to distinguish strains of *Salmonella enterica*  
994 serovar Heidelberg. *PLoS One* 13(2), e0192233. doi:  
995 10.1371/journal.pone.0192233.
- 996 Vangay, P., Fugett, E.B., Sun, Q., and Wiedmann, M. (2013). Food microbe tracker: a  
997 web-based tool for storage and comparison of food-associated microbes. *J*  
998 *Food Prot* 76(2), 283-294. doi: 10.4315/0362-028X.JFP-12-276.
- 999 Walker, T.M., Merker, M., Knoblauch, A.M., Helbling, P., Schoch, O.D., van der  
1000 Werf, M.J., et al. (2018). A cluster of multidrug-resistant *Mycobacterium*  
1001 *tuberculosis* among patients arriving in Europe from the Horn of Africa: a  
1002 molecular epidemiological study. *Lancet Infect Dis* 18(4), 431-440. doi:  
1003 10.1016/S1473-3099(18)30004-5.
- 1004 Wickham, H. (2018). stringr: Simple, Consistent Wrappers for Common String  
1005 Operations. R package version 1.3.1. [https://CRAN.R-](https://CRAN.R-project.org/package=stringr)  
1006 [project.org/package=stringr](https://CRAN.R-project.org/package=stringr).

*Bacillus cereus* outbreak genomic sequencing

1007 **10 Tables**

1008 **Table 1.** Variant calling pipelines tested in this study.

| Pipeline <sup>a</sup> | Approach              | Reference-based | Input data (file format) <sup>b</sup> | Read mapper    | Variant caller    | Reference(s) and in-depth pipeline descriptions                                                                                       |
|-----------------------|-----------------------|-----------------|---------------------------------------|----------------|-------------------|---------------------------------------------------------------------------------------------------------------------------------------|
| <b>CFSAN</b>          | Read mapping          | Yes             | PE reads (fastq)                      | Bowtie2        | Varscan           | <a href="http://snp-pipeline.readthedocs.io/en/latest/">http://snp-pipeline.readthedocs.io/en/latest/</a>                             |
| <b>Freebayes</b>      | Read mapping          | Yes             | PE reads (fastq)                      | BWA MEM        | Freebayes         | <a href="https://github.com/lmc297/SNPBac">https://github.com/lmc297/SNPBac</a>                                                       |
| <b>kSNP3</b>          | <i>k</i> -mer based   | No              | Contigs (fasta)                       | Not applicable | kSNP3             | <a href="https://sourceforge.net/projects/ksnp/files/">https://sourceforge.net/projects/ksnp/files/</a>                               |
| <b>LYVE-SET</b>       | Read mapping          | Yes             | PE reads (fastq)                      | SMALT          | Varscan           | <a href="https://github.com/lskatz/lyve-SET">https://github.com/lskatz/lyve-SET</a>                                                   |
| <b>Parsnp</b>         | Core genome alignment | Yes             | Contigs (fasta)                       | Not applicable | Parsnp            | <a href="http://harvest.readthedocs.io/en/latest/content/parsnp.html">http://harvest.readthedocs.io/en/latest/content/parsnp.html</a> |
| <b>Samtools</b>       | Read mapping          | Yes             | PE reads (fastq)                      | BWA MEM        | Samtools/Bcftools | <a href="https://github.com/lmc297/SNPBac">https://github.com/lmc297/SNPBac</a>                                                       |

1009 <sup>a</sup>CFSAN, U.S. Food and Drug Administration (FDA) Center for Food Safety and Applied Nutrition SNP pipeline; LYVE-SET, U.S. Centers for Disease Control and  
 1010 Prevention (CDC) *Listeria*, *Yersinia*, *Vibrio*, and *Enterobacteriaceae* SNP Extraction Tool

1011 <sup>b</sup>PE reads, Illumina paired-end reads

1012



1013 **Table 2.** Reference genomes used for reference-based variant calling in this study.

| Reference Genome                                   | Clade <sup>a</sup> | Data set(s) <sup>b</sup>                                                          | ANI Range <sup>c</sup>                                    | NCBI<br>Accession | Assembly<br>Level | Rationale for Selection                                                                                                                                                                                                                           |
|----------------------------------------------------|--------------------|-----------------------------------------------------------------------------------|-----------------------------------------------------------|-------------------|-------------------|---------------------------------------------------------------------------------------------------------------------------------------------------------------------------------------------------------------------------------------------------|
| <i>B. cereus</i> strain ATCC 14579 chromosome      | IV                 | All 33 isolates from two clades (clades III and IV)                               | 98.8-98.9 (clade IV)<br>91.8-92.3 (clade III)             | NC_004722.1       | Complete Genome   | <i>B. cereus s.s.</i> type strain; RefSeq reference genome; member of <i>panC</i> clade IV, the same clade as the three non-emetic outbreak-associated isolates sequenced in this study                                                           |
| <i>B. cereus</i> strain AH187 chromosome           | III                | All 33 isolates from two clades (clades III and IV); 30 emetic clade III isolates | 92.0-92.2 (clade IV)<br>99.8-99.9 (clade III)             | NC_011658.1       | Complete Genome   | Human clinical isolate associated with an emetic outbreak in 1972 (cooked rice, United Kingdom); identical virulotype, MLST sequence type, <i>rpoB</i> allelic type, and <i>panC</i> clade as 30 emetic outbreak isolates sequenced in this study |
| <i>B. cytotoxicus</i> strain NVH 391-98 chromosome | VII                | All 33 isolates from two clades (clades III and IV)                               | 82.6-82.7 (clade IV)<br>82.5-82.9 (clade III)             | NC_009674.1       | Complete Genome   | Type strain of <i>B. cytotoxicus</i> , the most distant member of the <i>B. cereus</i> group as currently defined; shares a common ancestor with all isolates sequenced in this study                                                             |
| FOOD_10_19_16_RSNT1_2H_R9-6393                     | III                | 30 emetic clade III isolates                                                      | 92.0-92.2 (clade IV)<br>100 <sup>d</sup> -100 (clade III) | SRR6825038        | Contigs           | Emetic isolate from the outbreak reported here; assembly had high per-base coverage, as well as the fewest number of contigs of all genome assemblies from isolates in this outbreak                                                              |

1014 <sup>a</sup>Clade determined via *panC* clade assignment function in BTyper version 2.2.0

1015 <sup>b</sup>Data set(s) in this study for which a given genome was used as a reference genome for reference-based SNP calling

1016 <sup>c</sup>Minimum and maximum average nucleotide identity (ANI) values of reference strain relative to clade IV and clade III genomes sequenced in this outbreak (n = 3 and 30, respectively) calculated using FastANI

1017 <sup>d</sup>Minimum ANI value was less than 100 prior to rounding

1018

1019

1020 **Table 3.** List of outbreak isolates and corresponding metadata, single- and multi-locus sequence types, and species.

| Isolate Name                   | Source (General) | Source (Specific) | Collection Date | Isolation Date | Production Date/Batch <sup>a</sup> | <i>panC</i> Clade <sup>b</sup> | MLST ST <sup>c</sup> | <i>rpoB</i> AT <sup>d</sup> | Closest Type Strain (ANI) <sup>e</sup> |
|--------------------------------|------------------|-------------------|-----------------|----------------|------------------------------------|--------------------------------|----------------------|-----------------------------|----------------------------------------|
| FOOD_10_18_16_LFTOV_NA_R9-6400 | Food             | Leftovers         | 9-Oct-16        | 18-Oct-16      | Unknown                            | III                            | 26                   | 125                         | <i>B. paranthracis</i> MN5 (97.5)      |
| FOOD_10_18_16_LFTOV_NA_R9-6401 | Food             | Leftovers         | 9-Oct-16        | 18-Oct-16      | Unknown                            | III                            | 26                   | 125                         | <i>B. paranthracis</i> MN5 (97.5)      |
| FOOD_10_18_16_LFTOV_NA_R9-6402 | Food             | Leftovers         | 9-Oct-16        | 18-Oct-16      | Unknown                            | III                            | 26                   | 125                         | <i>B. paranthracis</i> MN5 (97.5)      |
| FOOD_10_19_16_RSNT1_1B_R9-6388 | Food             | Restaurant 1      | 6-Oct-16        | 19-Oct-16      | 1/B                                | III                            | 26                   | 125                         | <i>B. paranthracis</i> MN5 (97.5)      |
| FOOD_10_19_16_RSNT1_1B_R9-6389 | Food             | Restaurant 1      | 6-Oct-16        | 19-Oct-16      | 1/B                                | III                            | 26                   | 125                         | <i>B. paranthracis</i> MN5 (97.5)      |
| FOOD_10_19_16_RSNT1_1B_R9-6390 | Food             | Restaurant 1      | 6-Oct-16        | 19-Oct-16      | 1/B                                | III                            | 26                   | 125                         | <i>B. paranthracis</i> MN5 (97.5)      |
| FOOD_10_19_16_RSNT1_1B_R9-6391 | Food             | Restaurant 1      | 6-Oct-16        | 19-Oct-16      | 1/B                                | III                            | 26                   | 125                         | <i>B. paranthracis</i> MN5 (97.5)      |
| FOOD_10_19_16_RSNT1_2A_R9-6386 | Food             | Restaurant 1      | 6-Oct-16        | 19-Oct-16      | 2/A                                | III                            | 26                   | 125                         | <i>B. paranthracis</i> MN5 (97.5)      |
| FOOD_10_19_16_RSNT1_2A_R9-6387 | Food             | Restaurant 1      | 6-Oct-16        | 19-Oct-16      | 2/A                                | III                            | 26                   | 125                         | <i>B. paranthracis</i> MN5 (97.5)      |
| FOOD_10_19_16_RSNT1_2H_R9-6392 | Food             | Restaurant 1      | 6-Oct-16        | 19-Oct-16      | 2/H                                | III                            | 26                   | 125                         | <i>B. paranthracis</i> MN5 (97.5)      |
| FOOD_10_19_16_RSNT1_2H_R9-6393 | Food             | Restaurant 1      | 6-Oct-16        | 19-Oct-16      | 2/H                                | III                            | 26                   | 125                         | <i>B. paranthracis</i> MN5 (97.5)      |
| FOOD_10_19_16_RSNT1_2H_R9-6394 | Food             | Restaurant 1      | 6-Oct-16        | 19-Oct-16      | 2/H                                | III                            | 26                   | 125                         | <i>B. paranthracis</i> MN5 (97.5)      |
| FOOD_10_19_16_RSNT1_2H_R9-6395 | Food             | Restaurant 1      | 6-Oct-16        | 19-Oct-16      | 2/H                                | III                            | 26                   | 125                         | <i>B. paranthracis</i> MN5 (97.5)      |
| FOOD_10_19_16_RSNT1_2H_R9-6396 | Food             | Restaurant 1      | 6-Oct-16        | 19-Oct-16      | 2/H                                | III                            | 26                   | 125                         | <i>B. paranthracis</i> MN5 (97.5)      |
| FOOD_10_19_16_RSNT2_2A_R9-6397 | Food             | Restaurant 2      | 6-Oct-16        | 19-Oct-16      | 2/A                                | III                            | 26                   | 125                         | <i>B. paranthracis</i> MN5 (97.5)      |
| FOOD_10_19_16_RSNT2_2A_R9-6398 | Food             | Restaurant 2      | 6-Oct-16        | 19-Oct-16      | 2/A                                | III                            | 26                   | 125                         | <i>B. paranthracis</i> MN5 (97.5)      |
| FOOD_10_19_16_RSNT2_2A_R9-6399 | Food             | Restaurant 2      | 6-Oct-16        | 19-Oct-16      | 2/A                                | III                            | 26                   | 125                         | <i>B. paranthracis</i> MN5 (97.6)      |
| FOOD_10_19_16_RSNT3_1E_R9-6407 | Food             | Restaurant 3      | 6-Oct-16        | 19-Oct-16      | 1/E                                | III                            | 26                   | 125                         | <i>B. paranthracis</i> MN5 (97.5)      |
| FOOD_10_19_16_RSNT3_2A_R9-6403 | Food             | Restaurant 3      | 6-Oct-16        | 19-Oct-16      | 2/A                                | III                            | 26                   | 125                         | <i>B. paranthracis</i> MN5 (97.5)      |
| FOOD_10_19_16_RSNT3_2A_R9-6404 | Food             | Restaurant 3      | 6-Oct-16        | 19-Oct-16      | 2/A                                | III                            | 26                   | 125                         | <i>B. paranthracis</i> MN5 (97.5)      |
| FOOD_10_19_16_RSNT3_2A_R9-6405 | Food             | Restaurant 3      | 6-Oct-16        | 19-Oct-16      | 2/A                                | III                            | 26                   | 125                         | <i>B. paranthracis</i> MN5 (97.5)      |
| FOOD_10_19_16_RSNT4_2B_R9-6408 | Food             | Restaurant 4      | 6-Oct-16        | 19-Oct-16      | 2/B                                | III                            | 26                   | 125                         | <i>B. paranthracis</i> MN5 (97.5)      |
| FOOD_10_19_16_RSNT4_2B_R9-6409 | Food             | Restaurant 4      | 6-Oct-16        | 19-Oct-16      | 2/B                                | III                            | 26                   | 125                         | <i>B. paranthracis</i> MN5 (97.5)      |
| FOOD_10_19_16_RSNT5_1C_R9-6411 | Food             | Restaurant 5      | 6-Oct-16        | 19-Oct-16      | 1/C                                | III                            | 26                   | 125                         | <i>B. paranthracis</i> MN5 (97.5)      |
| HUMN_10_18_16_FECAL_NA_R9-6384 | Human            | Feces             | 7-Oct-16        | 18-Oct-16      | NA                                 | III                            | 26                   | 125                         | <i>B. paranthracis</i> MN5 (97.6)      |
| HUMN_10_18_16_FECAL_NA_R9-6385 | Human            | Feces             | 8-Oct-16        | 18-Oct-16      | NA                                 | III                            | 26                   | 125                         | <i>B. paranthracis</i> MN5 (97.5)      |
| HUMN_10_18_16_FECAL_NA_R9-6412 | Human            | Feces             | 8-Oct-16        | 18-Oct-16      | NA                                 | III                            | 26                   | 125                         | <i>B. paranthracis</i> MN5 (97.5)      |
| HUMN_10_19_16_FECAL_NA_R9-6381 | Human            | Feces             | 7-Oct-16        | 19-Oct-16      | NA                                 | III                            | 26                   | 125                         | <i>B. paranthracis</i> MN5 (97.5)      |
| HUMN_10_19_16_FECAL_NA_R9-6382 | Human            | Feces             | 7-Oct-16        | 19-Oct-16      | NA                                 | III                            | 26                   | 125                         | <i>B. paranthracis</i> MN5 (97.5)      |
| HUMN_10_19_16_FECAL_NA_R9-6383 | Human            | Feces             | 7-Oct-16        | 19-Oct-16      | NA                                 | III                            | 26                   | 125                         | <i>B. paranthracis</i> MN5 (97.5)      |
| FOOD_10_19_16_RSNT3_1E_R9-6406 | Food             | Restaurant 3      | 6-Oct-16        | 19-Oct-16      | 1/E                                | IV                             | 24                   | 92                          | <i>B. cereus</i> ATCC 14579 (98.9)     |
| FOOD_10_19_16_RSNT5_1C_R9-6410 | Food             | Restaurant 5      | 6-Oct-16        | 19-Oct-16      | 1/C                                | IV                             | 24                   | 92                          | <i>B. cereus</i> ATCC 14579 (98.9)     |
| HUMN_10_26_16_FECAL_NA_R9-6413 | Human            | Feces             | 8-Oct-16        | 26-Oct-16      | NA                                 | IV                             | 142                  | 92                          | <i>B. cereus</i> ATCC 14579 (98.8)     |

1021 <sup>a</sup>Production date is designated by either 1 or 2; batch is one of A through H

1022 <sup>b</sup>*panC* clade assigned *in silico* using BTyper 2.2.0

1023 <sup>c</sup>Multi-locus sequence typing (MLST) sequence type (ST) assigned *in silico* using BTyper 2.2.0

1024 <sup>d</sup>*rpoB* allelic type (AT) determined using Sanger sequencing and verified *in silico* using BTyper 2.2.0

1025 <sup>e</sup>ANI, average nucleotide identity calculated using FastANI

1026 **Table 4.** *P*-values obtained from pairwise tests of tree topologies using a *Z* test based on the Kendall-  
 1027 Colijn metric.<sup>a</sup>

| <b>Pipeline</b>  | <i>CFSAN</i>   | <i>Freebayes</i> | <i>kSNP3</i>   | <i>LYVE-SET</i> | <i>Parsnp</i> |
|------------------|----------------|------------------|----------------|-----------------|---------------|
| <i>CFSAN</i>     |                |                  |                |                 |               |
| <i>Freebayes</i> | 1.00           |                  |                |                 |               |
| <i>kSNP3</i>     | 0.8699         | 0.0393           |                |                 |               |
| <i>LYVE-SET</i>  | 0 <sup>b</sup> | 0.0041           | 0.9987         |                 |               |
| <i>Parsnp</i>    | 1              | 0.3984           | 0 <sup>b</sup> | 1               |               |
| <i>Samtools</i>  | 1              | 0.9322           | 1              | 1               | 1             |

1028 <sup>a</sup>See Katz, et al. (Katz et al., 2017) and Kendall and Colijn (Kedall and Colijn, 2015)

1029 <sup>b</sup>Denotes significance at the  $\alpha = 0.05$  level after a Bonferroni correction

1030 **11 Figure Legends**

1031 **Figure 1.** Maximum likelihood phylogeny of core SNPs identified in 33 isolates sequenced in  
1032 conjunction with a *B. cereus* outbreak, as well as genomes of the 18 currently recognized *B. cereus*  
1033 group species (shown in gray). Core SNPs were identified in all genomes using kSNP3. Heatmap  
1034 corresponds to presence/absence of *B. cereus* group virulence genes detected in each sequence using  
1035 BTypers. Tip labels in maroon and teal correspond to the 7 human clinical isolates and 26 isolates  
1036 from food sequenced in conjunction with this outbreak, respectively. Phylogeny is rooted at the  
1037 midpoint, and branch labels correspond to bootstrap support percentages out of 500 replicates.

1038

1039 **Figure 2.** Percentage viability of HeLa cells when treated with supernatants of each isolate as  
1040 determined by the WST-1 assay. Viability was calculated as ratio of corrected absorbance of solution  
1041 when HeLa cells were treated with supernatants to the ratio of corrected absorbance of solution when  
1042 HeLa cells were treated with BHI (i.e., negative control), converted to percentages. The columns  
1043 represent the mean viabilities, while the error bars represent standard deviations for 12 technical  
1044 replicates.

1045

1046 **Figure 3.** Number of core SNPs identified in (A) 33 *B. cereus* group isolates from two clades (30 and  
1047 3 isolates from clades III and IV, respectively) and (B) 30 emetic *B. cereus* group isolates from clade  
1048 III, sequenced in conjunction with a foodborne outbreak. Combinations of five reference-based  
1049 variant calling pipelines and (A) three and (B) two reference genomes, as well as one reference-free  
1050 SNP calling method (kSNP3), were tested.

1051

1052 **Figure 4.** Comparison of SNP positions reported by five variant-calling pipelines for 33 *B. cereus*  
1053 group strains isolated in association with a foodborne outbreak, with the chromosomes of (A) *B.*  
1054 *cereus* str. AH187 (Clade III), (B) *B. cereus s.s.* str. ATCC 14579 (Clade IV), and (C) *B. cytotoxicus*  
1055 str. NVH 391-98 (Clade VII) used as reference genomes. Ellipses represent each pipeline.

1056

1057 **Figure 5.** Ranges of pairwise core SNP differences between 30 emetic clade III *B. cereus* group  
1058 strains isolated in conjunction with a foodborne outbreak. Combinations of five reference-based  
1059 variant calling pipelines and two reference genomes, as well as one reference-free SNP calling  
1060 method (kSNP3) were tested. Lower and upper box hinges correspond to the first and third quartiles,  
1061 respectively. Lower and upper whiskers extend from the hinge to the smallest and largest values no  
1062 more distant than 1.5 times the interquartile range from the hinge, respectively. Points represent  
1063 pairwise distances that fall beyond the ends of the whiskers.

1064

1065 **Figure 6.** Comparison of SNP positions reported by five variant-calling pipelines for 30 emetic clade  
1066 III *B. cereus* group outbreak isolates. Ellipses represent each pipeline, all of which used the  
1067 chromosome of emetic clade III *B. cereus* strain AH187 as a reference for variant calling.

1068

1069 **Figure 7.** Maximum likelihood phylogenies constructed using core SNPs detected in 30 emetic clade  
1070 III outbreak isolates using the (A) Samtools, (B) Freebayes, (C) CFSAN, (D) LYVE-SET, (E)  
1071 Parsnp, and (F) kSNP3 variant calling pipelines using *B. cereus* str. AH187 as reference. Branch  
1072 labels correspond to bootstrap support percentages out of 1,000 replicates, while like-colored tip  
1073 labels correspond to isolates from the same source (human clinical fecal sample, leftovers, or  
1074 restaurant 1, 2, 3, 4, or 5).

1075

1076 **Figure 8.** Maximum likelihood phylogenies of 30 emetic clade III isolates (ST 26) sequenced in  
1077 conjunction with a *B. cereus* outbreak, as well as all other emetic clade III ST 26 genomes available  
1078 in NCBI (n = 25; shown in black). Trees were constructed using core SNPs identified using (A)  
1079 kSNP3 or (B) Parsnp. Tip labels in maroon and teal correspond to the 6 human clinical isolates and  
1080 24 isolates from food sequenced in conjunction with this outbreak, respectively. Branch labels  
1081 correspond to bootstrap support percentages out of 1,000 replicates.

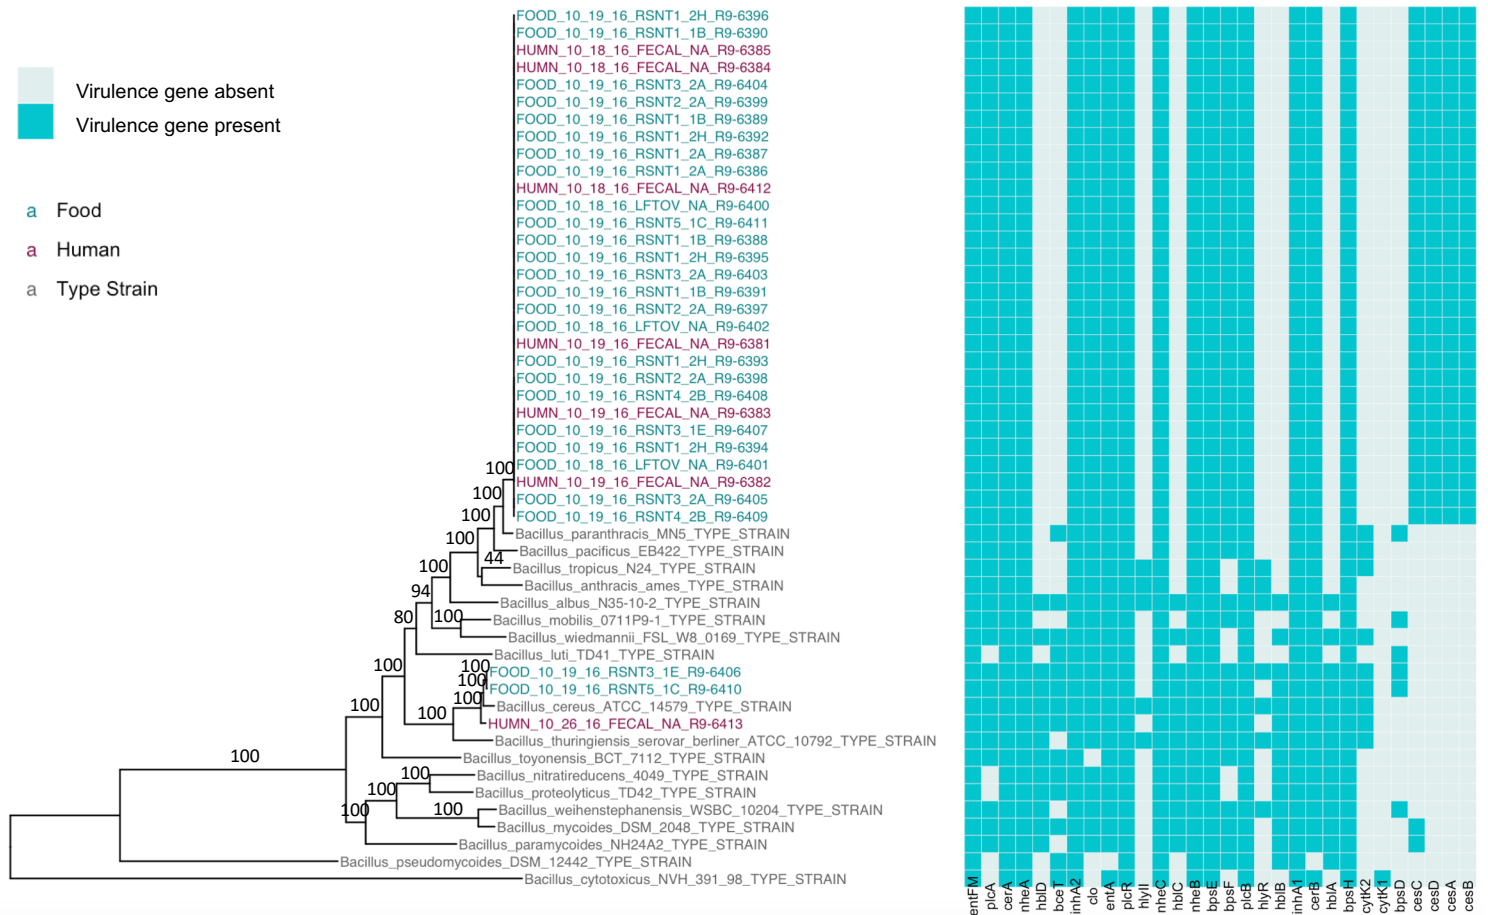

Figure 1. Maximum likelihood phylogeny of core SNPs identified in 33 isolates sequenced in conjunction with a *B. cereus* outbreak, as well as genomes of the 18 currently recognized *B. cereus* group species (shown in gray). Core SNPs were identified in all genomes using kSNP3. Heatmap corresponds to presence/absence of *B. cereus* group virulence genes detected in each sequence using BTyper. Tip labels in maroon and teal correspond to the 7 human clinical isolates and 26 isolates from food sequenced in conjunction with this outbreak, respectively. Phylogeny is rooted at the midpoint, and branch labels correspond to bootstrap support percentages out of 500 replicates.

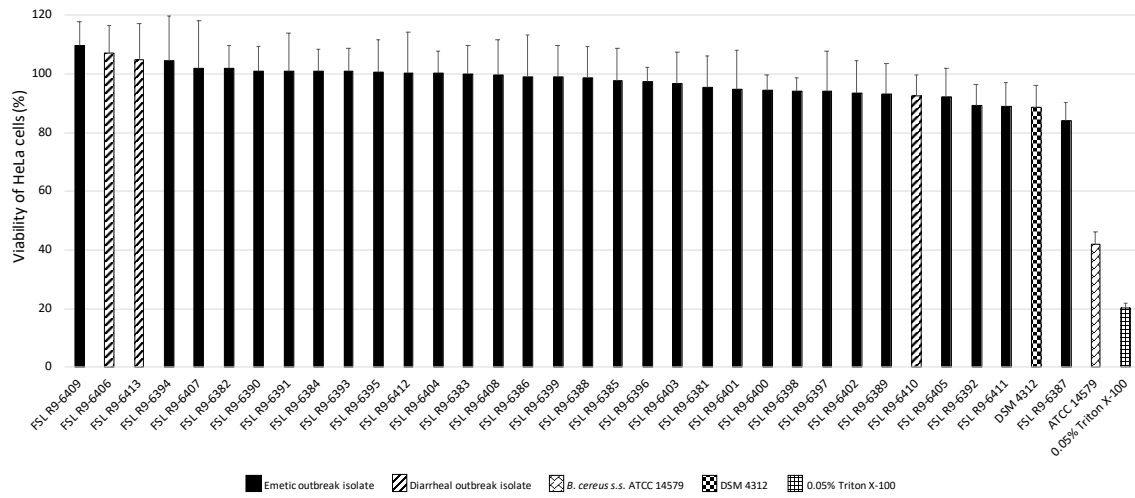

**Figure 2.** Percentage viability of HeLa cells when treated with supernatants of each isolate as determined by the WST-1 assay. Viability was calculated as ratio of corrected absorbance of solution when HeLa cells were treated with supernatants to the ratio of corrected absorbance of solution when HeLa cells were treated with BHI (i.e., negative control), converted to percentages. The columns represent the mean viabilities, while the error bars represent standard deviations for 12 technical replicates.

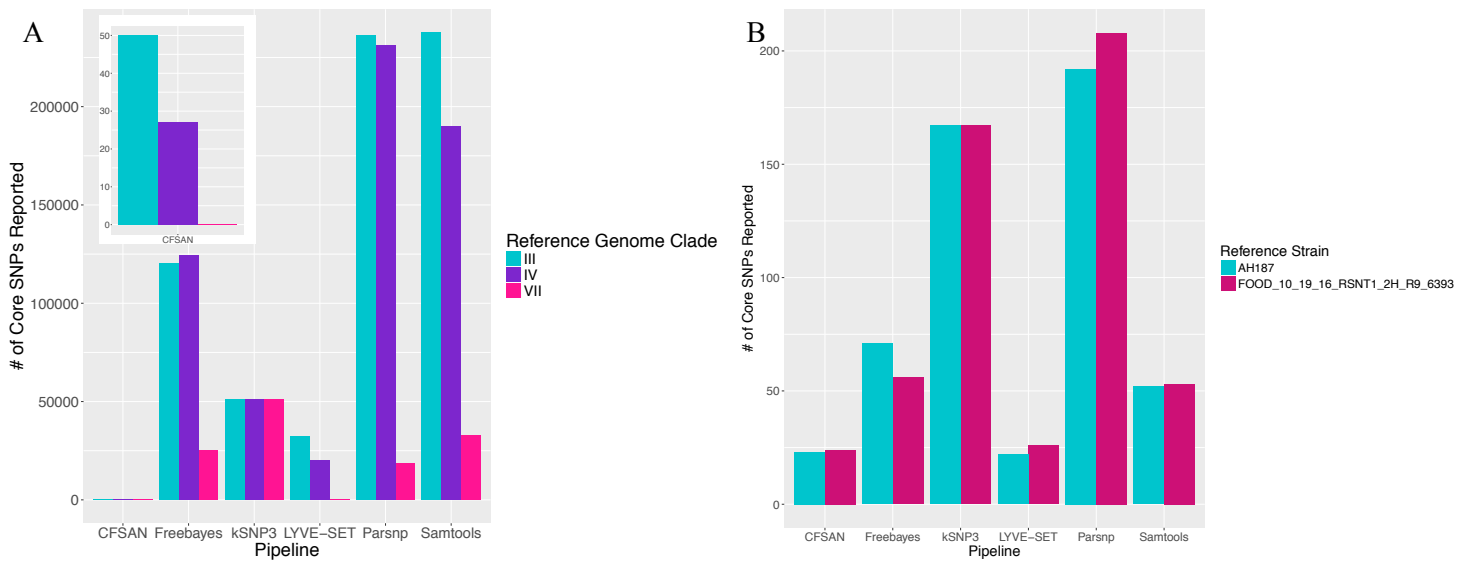

Figure 3. Number of core SNPs identified in (A) 33 *B. cereus* group isolates from two clades (30 and 3 isolates from clades III and IV, respectively) and (B) 30 emetic *B. cereus* group isolates from clade III, sequenced in conjunction with a foodborne outbreak. Combinations of five reference-based variant calling pipelines and (A) three and (B) two reference genomes, as well as one reference-free SNP calling method (kSNP3), were tested.



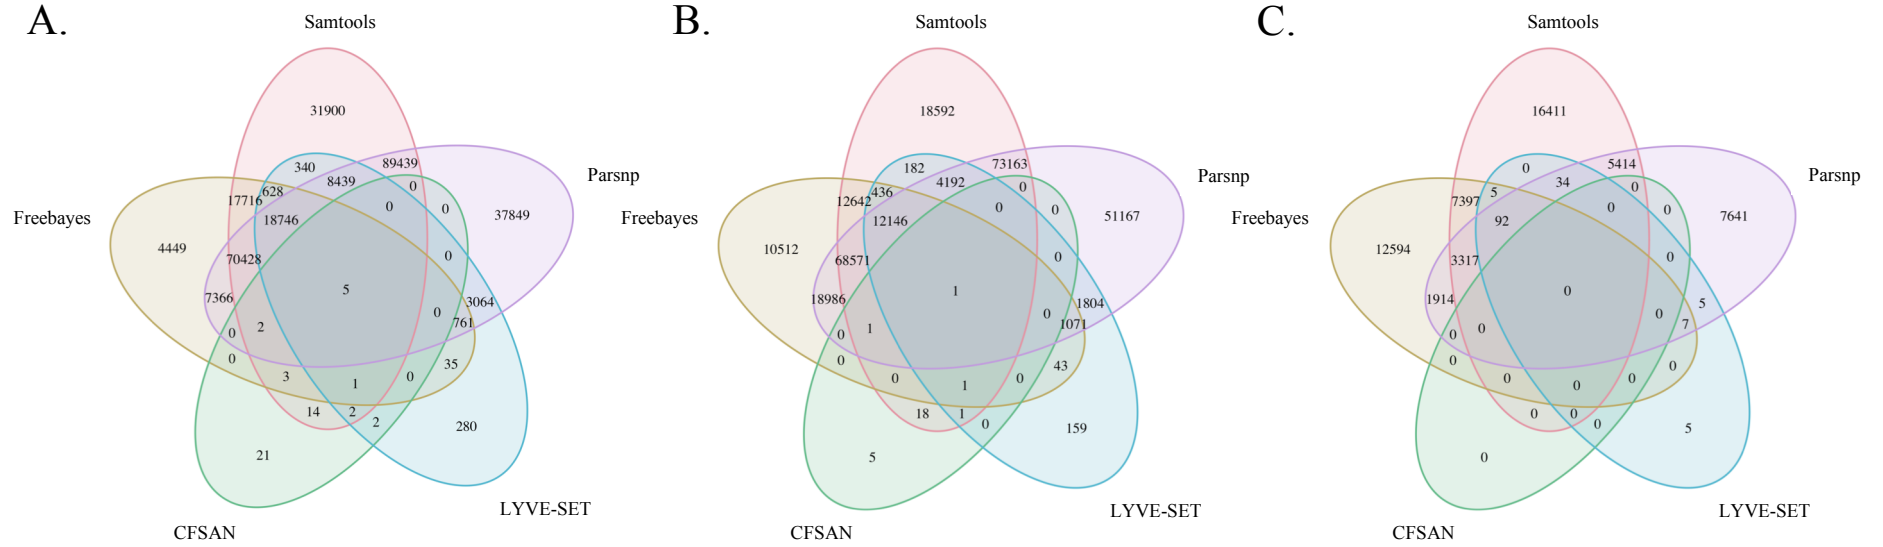

Figure 4. Comparison of SNP positions reported by five variant-calling pipelines for 33 *B. cereus* group strains isolated in association with a foodborne outbreak, with the chromosomes of (A) *B. cereus* str. AH187 (Clade III), (B) *B. cereus* s.s. str. ATCC 14579 (Clade IV), and (C) *B. cytotoxicus* str. NVH 391-98 (Clade VII) used as reference genomes. Ellipses represent each pipeline.

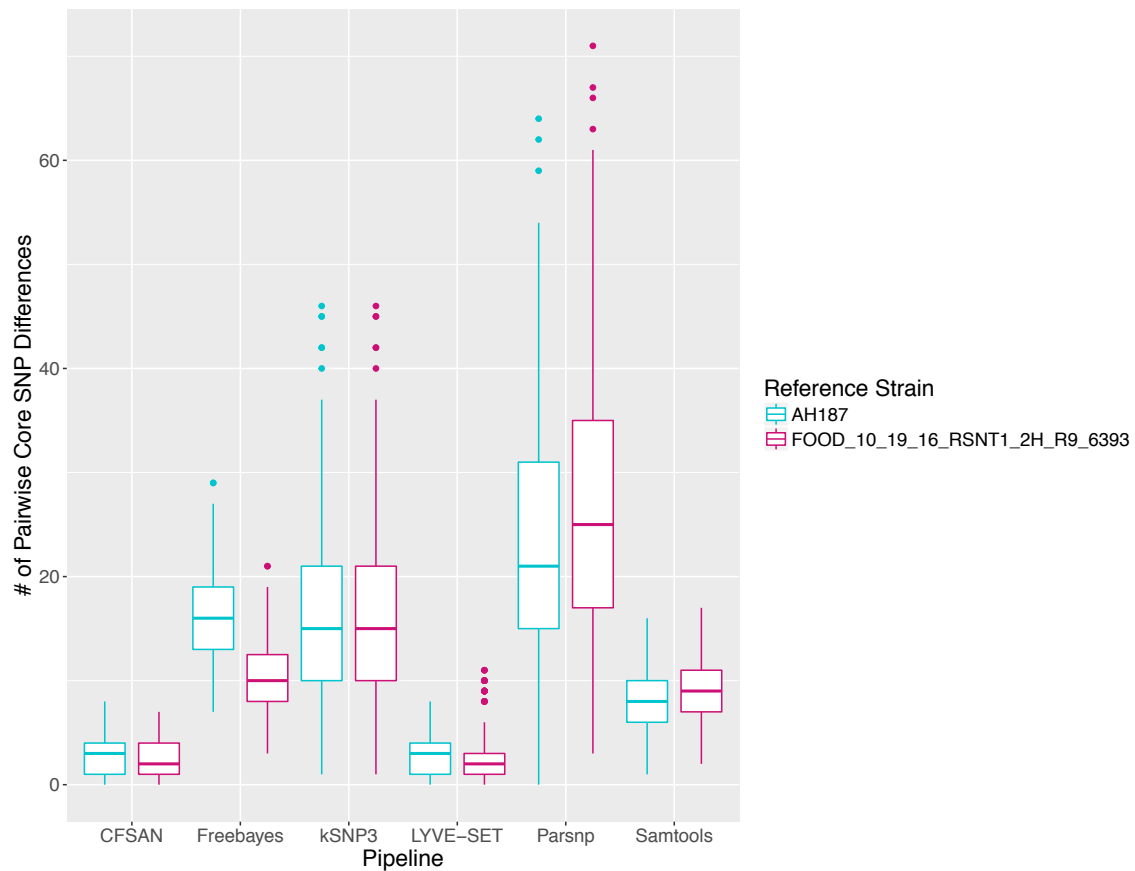

**Figure 5.** Ranges of pairwise core SNP differences between 30 emetic clade III *B. cereus* group strains isolated in conjunction with a foodborne outbreak. Combinations of five reference-based variant calling pipelines and two reference genomes, as well as one reference-free SNP calling method (kSNP3) were tested. Lower and upper box hinges correspond to the first and third quartiles, respectively. Lower and upper whiskers extend from the hinge to the smallest and largest values no more distant than 1.5 times the interquartile range from the hinge, respectively. Points represent pairwise distances that fall beyond the ends of the whiskers.

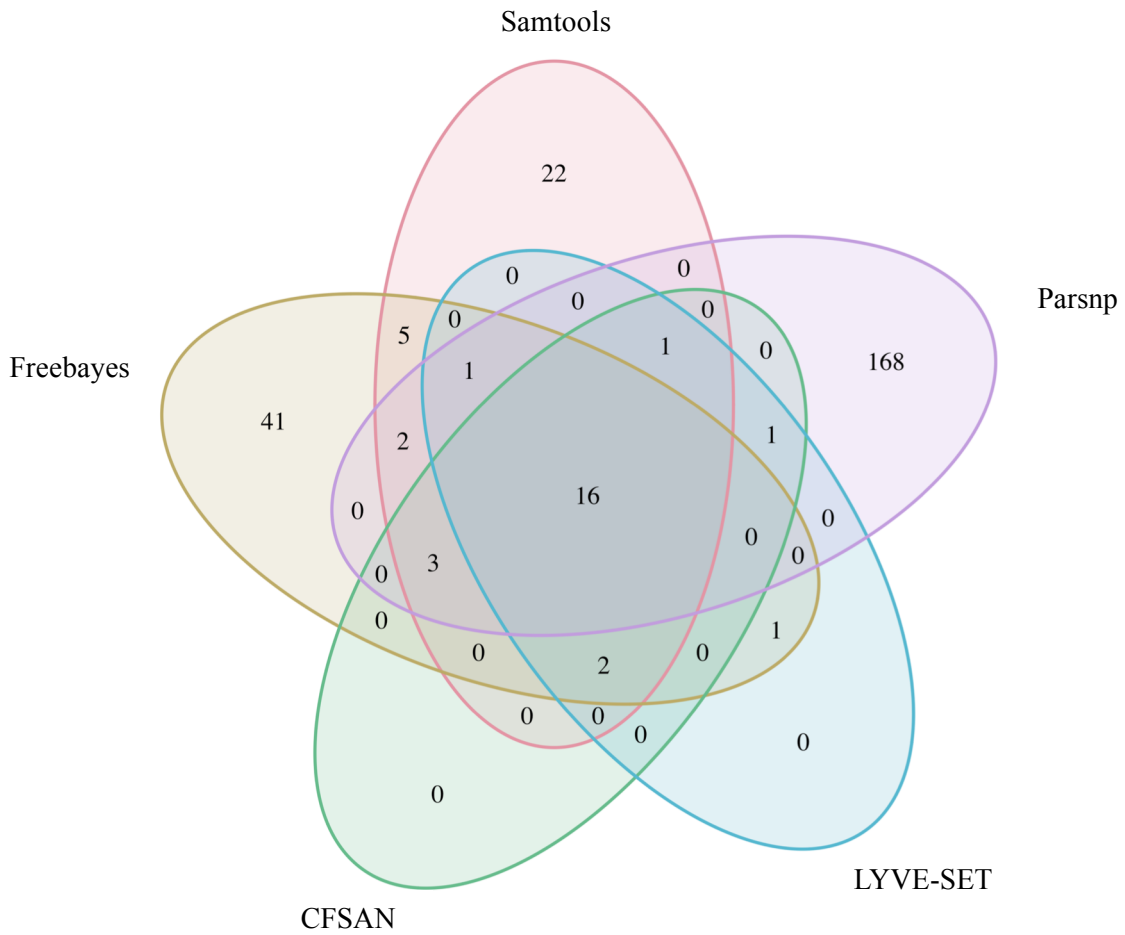

Figure 6. Comparison of SNP positions reported by five variant-calling pipelines for 30 emetic clade III *B. cereus* group outbreak isolates. Ellipses represent each pipeline, all of which used the chromosome of emetic clade III *B. cereus* strain AH187 as a reference for variant calling.

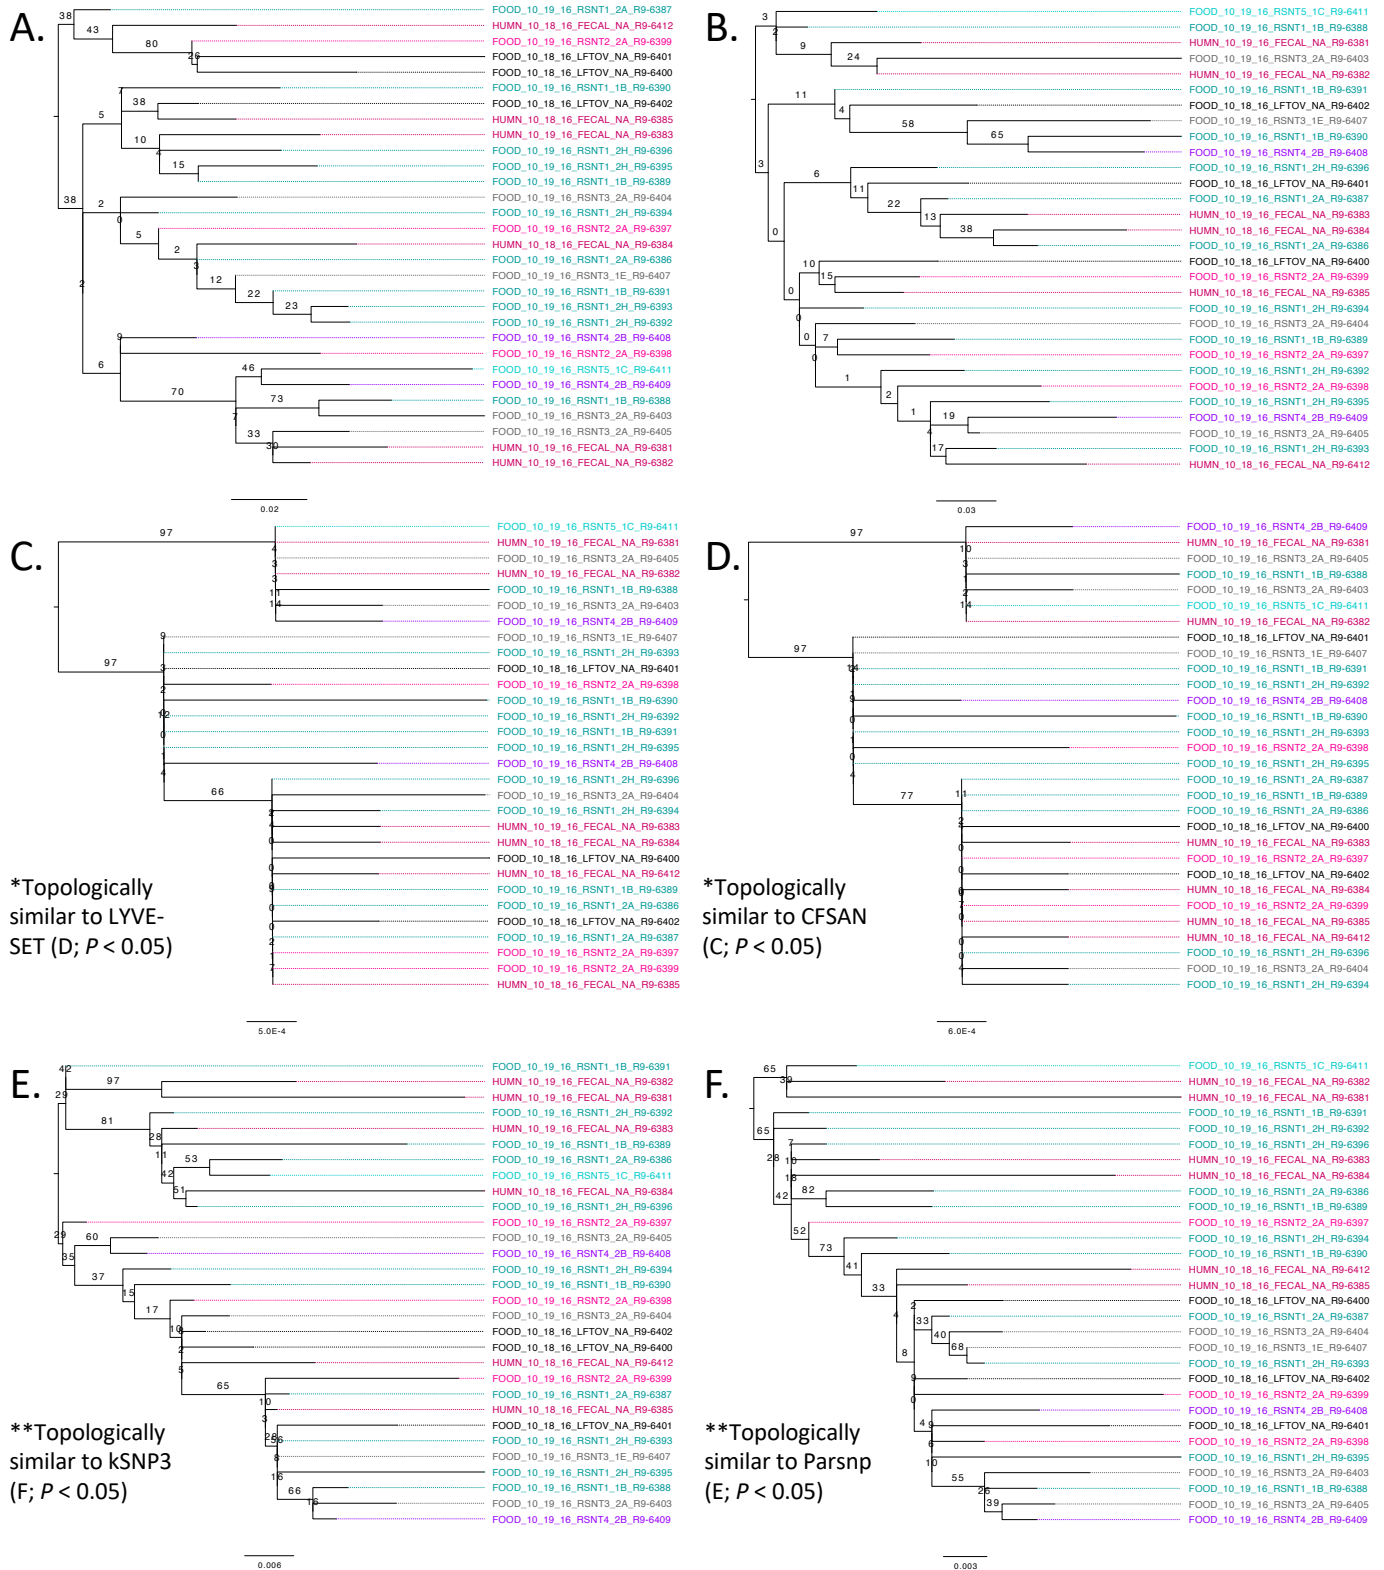

Figure 7. Maximum likelihood phylogenies constructed using core SNPs detected in 30 emetic clade III outbreak isolates using the (A) Samtools, (B) Freebayes, (C) CFSAN, (D) LYVE-SET, (E) Parsnp, and (F) kSNP3 variant calling pipelines using *B. cereus* str. AH187 as reference. Branch labels correspond to bootstrap support percentages out of 1,000 replicates, while like-colored tip labels correspond to isolates from the same source (human clinical fecal sample, leftovers, or restaurant 1, 2, 3, 4, or 5).

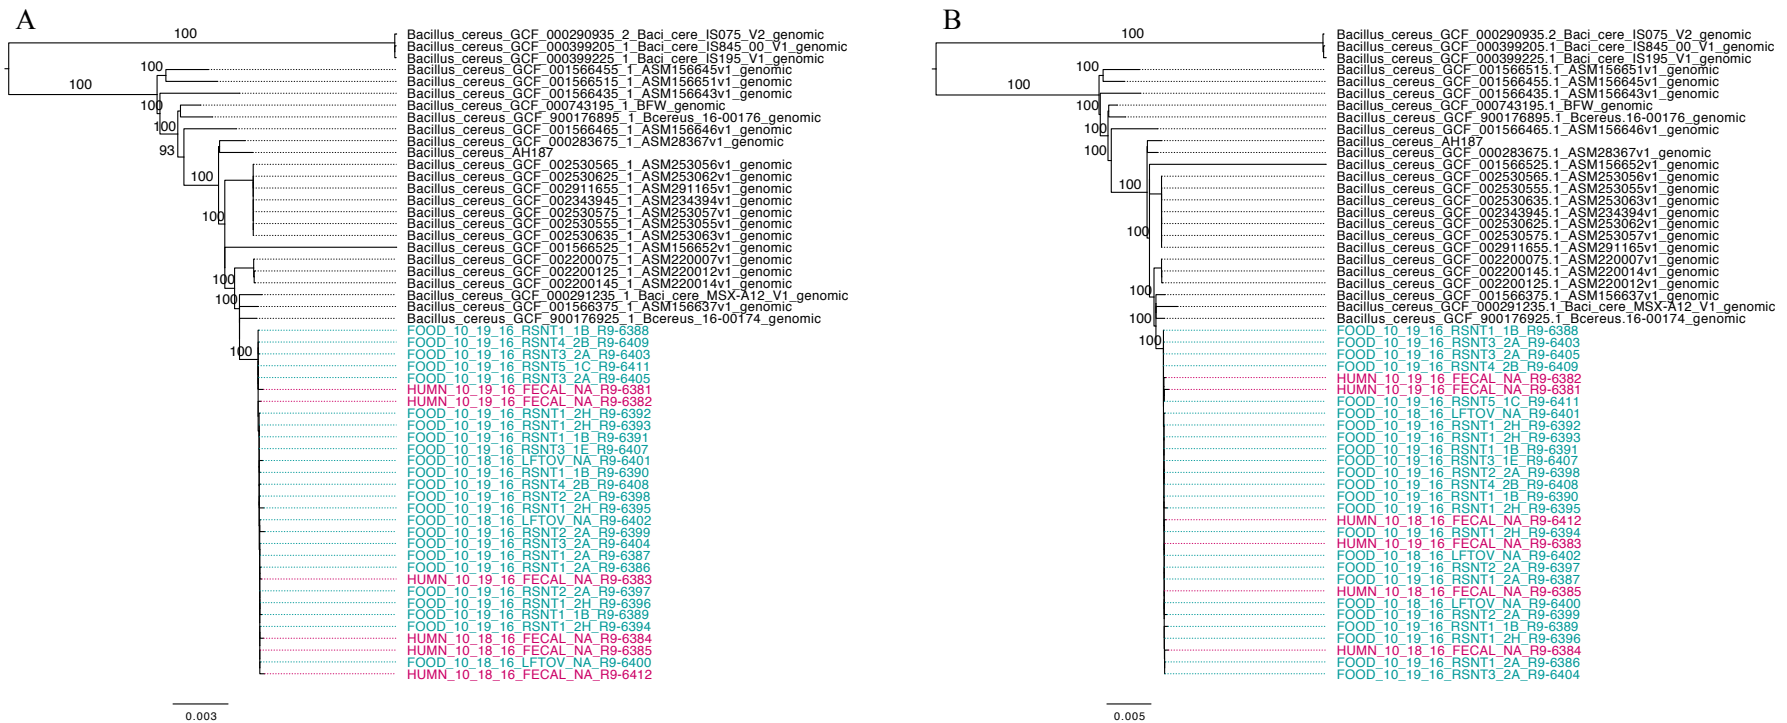

Figure 8. Maximum likelihood phylogenies of 30 emetic clade III isolates (ST 26) sequenced in conjunction with a *B. cereus* outbreak, as well as all other emetic clade III ST 26 genomes available in NCBI ( $n = 25$ ; shown in black). Trees were constructed using core SNPs identified using (A) kSNP3 or (B) Parsnp. Tip labels in maroon and teal correspond to the 6 human clinical isolates and 24 isolates from food sequenced in conjunction with this outbreak, respectively. Branch labels correspond to bootstrap support percentages out of 1,000 replicates.
